1 **NR4A3 is oxidative stress responsible transcription factor**  
2 **through HMOX1, and also controls cell cycle through CCNE1**  
3 **and CDK2 in pancreatic islet derived 1.1B4 cells**

4 Motoko Nakayama,<sup>1</sup> Etsuko Ueta,<sup>2</sup> Mitsuru Yoshida,<sup>1</sup> Yuri Shimizu,<sup>1,3</sup> Reiko Oguchi,<sup>1</sup>  
5 Atsuko Tokuda,<sup>1</sup> Yasuko Sone,<sup>1,4</sup> Yuri Nomi,<sup>1,5</sup> and Yuzuru Otsuka<sup>1,\*</sup>

6 <sup>1</sup>*Department of Life Science, Graduate School, Ochanomizu University, Bunkyo-ku,*  
7 *Tokyo, 112-8610, Japan,*

8 <sup>2</sup>*School of Health Science, Faculty of Medicine, Tottori University, Yonago, Tottori 683-*  
9 *8503, Japan,*

10 <sup>3</sup>*Department of Food Business, Nihon University, Fujisawa, Kanagawa 252-0880,*  
11 *Japan,*

12 <sup>4</sup>*Department of Health and Nutrition, Takasaki University of Health and Welfare,*  
13 *Takasaki, Gunma 370-0033, Japan*

14 <sup>5</sup>*Faculty of Applied Life Sciences, Niigata University of Pharmacy and Applied Life*  
15 *Sciences, Niigata 956-8603, Japan*

16

17 \* To whom correspondence should be addressed. Tel: +81-466-21-8149; Fax: +81-  
18 466-21-8149; Email: [otsuka.yuzuru@ocha.ac.jp](mailto:otsuka.yuzuru@ocha.ac.jp)

19

20 Running title "NR4A3 is oxidative transcription factor with HMOX1"

21 Key words: NR4A3, oxidative stress, transcription factor, microarray, HMOX1, cell cycle,  
22 CDK2

23

1    **ABSTRACT**

2    The mechanism of antioxidant defense system is still controversial. As islet  $\beta$ -cell is weak in  
3    oxidative condition, that causes diabetes mellitus, therefore, antioxidant defense system of  
4    human pancreatic islet derived 1.1B4 cell was analyzed. Cells were exposed to  $H_2O_2$  and  
5    comprehensive gene expression was analyzed by Agilent human microarray. *HMOX1* and  
6    *NR4A3*, member of orphan receptor, were up-regulated. Therefore, *NR4A3* was knocked down  
7    with siRNA, then analyzed gene expression by microarray, and found that the knocked down  
8    cells were weak in oxidative stress. *HMOX1* expression was strongly inhibited by siRNA of  
9    *NR4A3*, and *NR4A3* responsible sequence of aaggctca was found near the *HMOX1* gene,  
10   suggesting *NR4A3* is oxidative stress responsible transcription factor through *HMOX1*  
11   expression. The expression of *CCNE1* and *CDK2* was also inhibited by knocked down of  
12   *NR4A3*, it is suggested *NR4A3* is also important transcription factor for cell growth regulation.

13   [Supplemental material is available for this article.]

14

15    **INTRODUCTION**

16    The relentless decline in  $\beta$ -cell function frequently observed in type 2 diabetic patients and loss  
17    of functional  $\beta$ -cell mass is a hallmark of type 1 and type 2 diabetes, and methods for restoring  
18    these cells are needed (Tessem et al. 2014). However, despite optimal drug management, loss of  
19     $\beta$ -cell is not possible to stop, and has variously been attributed to glucose toxicity and lipo-  
20    toxicity. The former theory posits hyperglycemia, that elevated glucose concentrations increase  
21    levels of reactive oxygen species (ROS) in  $\beta$ -cell (Robertson 2004), which takes place within  
22    multiple mitochondrial and non-mitochondrial pathways. For example, high concentrations of  
23    glucose in vitro increase intracellular peroxide levels in islets, and decrease insulin expression  
24    by decreasing *PDX-1* and *MafA* expression (Robertson and Harmon 2006). In their paper, six

1 biochemical pathways along which glucose metabolism suggested to form ROS. One of  
2 pathway is glycation that is hyperglycemia produces glycation end product (AGE) that increases  
3 ROS, as AGE-BSA is known to increase production of ROS, and its apoptogenic effect was  
4 blocked by the antioxidant N-acetylcysteine (Weinberg et al. 2014). In physiologic  
5 concentrations, endogenous ROS help to maintain homeostasis, however, when ROS  
6 accumulate in excess for prolonged periods of time, they cause chronic oxidative stress and  
7 adverse effects. Thus, increased glucose produces ROS, and pancreatic  $\beta$ -cells are more  
8 sensitive to oxidative stress than other cell types because the expressions of antioxidant  
9 enzymes are low levels in pancreatic  $\beta$ -cell (Robertson 2004). Therefore, oxidative stress leads  
10 cellular damage to  $\beta$ -cell dysfunction. The effect of oxidative stress, however, on the  $\beta$ -cell is  
11 not understood well. Nitric oxide, peroxynitrite, hydrogen peroxide and other oxygen-reactive  
12 species might be involved in  $\beta$ -cell destruction during diabetes development (Mathis et al. 2001).  
13 Oxidative stress induces gene expression in heme oxygenase 1 (HMOX1), and the HMOX1  
14 gene (*HMOX1*) is frequently activated under a variety of cellular stress conditions, by four  
15 pathways including heat-shock factor, nuclear factor-kappa B, nuclear factor E2-related factor 2  
16 (NRF2), and activator protein-1 families, are arguably the most important regulators of the  
17 cellular stress response in vertebrates (Alam and Cook 2007). One of them, the Kelch-Like  
18 ECH-Associated Protein 1 (KEAP1)-NRF2 pathway in which pathway, NRF2 transcription  
19 factor directly bind to antioxidant responsible element (ARE) to induce antioxidant enzymes  
20 (Nguyen et al. 2009). However, another unknown pathway may be involved. For example,  
21 chronically excessive glucose and ROS levels can cause decreased insulin gene expression via  
22 loss of the transcription factors pancreatic and duodenal homeobox 1 (PDX1) and v-maf avian  
23 musculoaponeurotic fibrosarcoma oncogene homolog A (MAFA) and can also accelerate rates  
24 of apoptosis (Robertson 2004).

25 High glucose and oxidative stress induce cell damage not only to  $\beta$ -cell but also to other cells.  
26 There are many transcription factors and sensing proteins. Oxidants such as  $H_2O_2$  can damage

1 proteins, regulate transcription factors, and sometimes induces cell apoptosis (Marinho et al.  
2 2014). In his review, the regulatory mechanisms by which H<sub>2</sub>O<sub>2</sub> modulates the activity of  
3 transcription factors in bacteria (*OxyR* and *PerR*), lower eukaryotes (*Yap1*, *Maf1*, *Hsf1* and  
4 *Msn2/4*) and mammalian cells (*AP-1*, *NRF2*, *CREB*, *HSF1*, *HIF-1*, *TP53*, *NF-κB*, *NOTCH*, *SP1*  
5 and *SCREB-1*) are summarized. Furthermore, Klamt *et al.* (Klamt et al. 2009) found that the  
6 actin-binding protein cofilin is a key target of oxidation. When oxidation of this single  
7 regulatory protein is prevented, oxidant-induced apoptosis is inhibited.

8 As described above, high glucose increases ROS, and antioxidants repairs β-cells  
9 undergoing damage by oxidative stress, however, molecular mechanism of ROS on the islet β-  
10 cell is not well understood. Therefore, in this paper we focus on the mechanism of gene  
11 expression by ROS using H<sub>2</sub>O<sub>2</sub> in human pancreatic β-cells derived hybrid cell. Because,  
12 transformed cell used for in vitro experiment, the cells sometime lost their characteristic  
13 especially apoptosis pathway, otherwise cell will die. Furthermore, human normal islet cells are  
14 not available easily, 1.1B4 cells, the hybrid cell of normal islet cell with β-cell derived  
15 transformed PANC-1 cell was used here (McCluskey et al. 2011). In this paper we analyzed the  
16 effect of H<sub>2</sub>O<sub>2</sub> on the gene expression of 1.1B4 with Agilent microarray. Then key protein was  
17 knock down by siRNA method and analyzed cell viability under the H<sub>2</sub>O<sub>2</sub> addition. And gene  
18 expression of siRNA treated cells was analyzed by microarray again to find how this knock  
19 down of the key protein effect gene expression.

## 21 RESULTS

### 23 Effect of H<sub>2</sub>O<sub>2</sub> on 1.1B4 cells growth and gene expression analyzed by DNA microarray

24 Human pancreatic islet derived 1.1B4 cells were exposed to 10, 20, 30, 40, 50, 100, 200 μM  
25 H<sub>2</sub>O<sub>2</sub>, and the cell viability was measured by MTT assay (Fig. 1). We found that there was no  
26 toxicity of H<sub>2</sub>O<sub>2</sub> up to 50 μM, and the cell growth was inhibited at 100 μM of H<sub>2</sub>O<sub>2</sub> and  
27 completely suppressed at 200 μM. From this result, it was suggested that even the 1.1B4 cells  
28 express antioxidant enzymes to survive from H<sub>2</sub>O<sub>2</sub> stress but at higher concentration above 50  
29 μM of H<sub>2</sub>O<sub>2</sub>, cells were not able to grow well because of not enough antioxidant defense system.  
30 Therefore, to find antioxidant system of these cells, comprehensive analysis of gene expression  
31 of H<sub>2</sub>O<sub>2</sub> treated 1.1B4 cells was analyzed by DNA microarray at 100 μM H<sub>2</sub>O<sub>2</sub>. The 1.1B4 cells

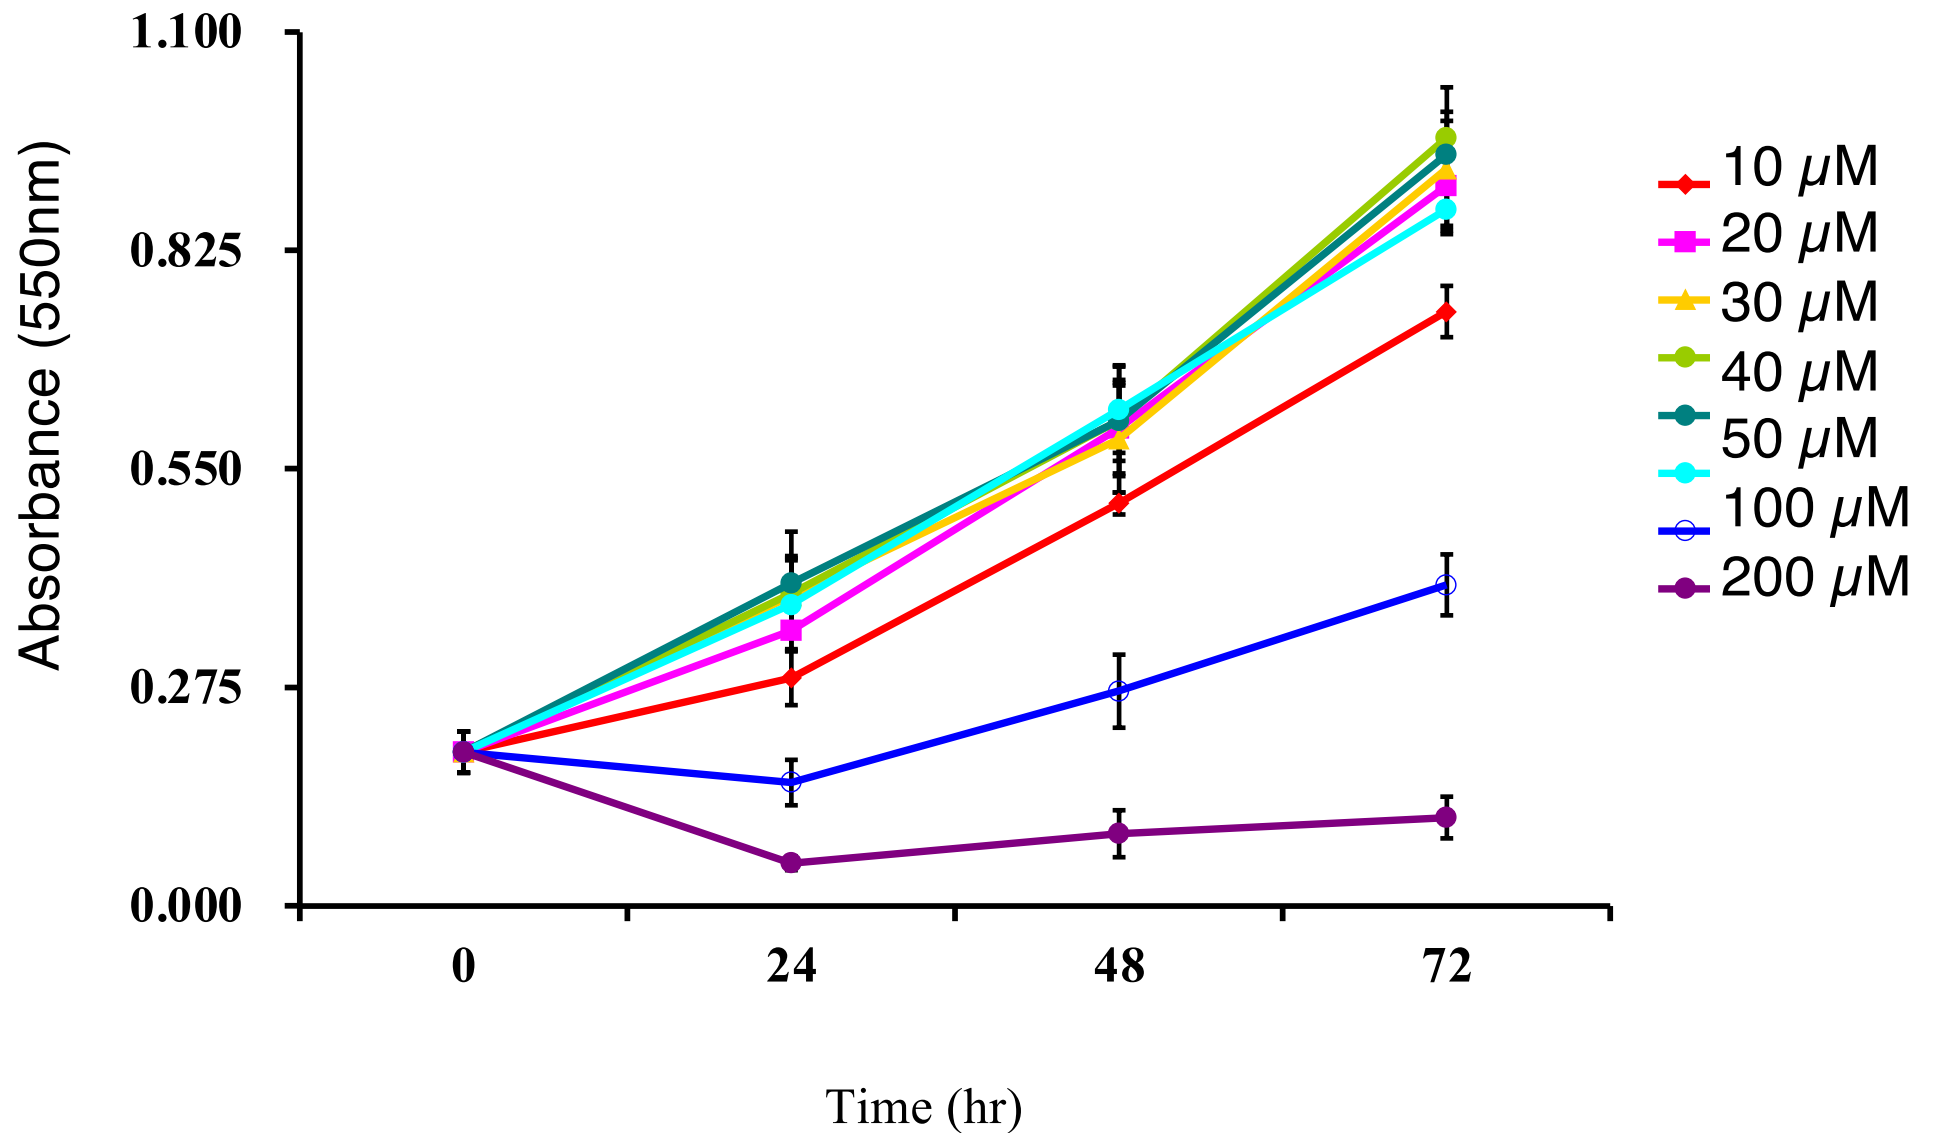

Fig.1. Effect of H<sub>2</sub>O<sub>2</sub> concentration on the cell growth of 1.1B4 islet derived cell. Islet derived 1.1B4 cell was seeded and cultured in RPMI-1640 medium, and 24 hours later cell was added H<sub>2</sub>O<sub>2</sub> to 10, 20, 30, 40, 50, 100, 200 μM and cell viability was analyzed at 24, 48 and 72 hours by MTT assay. (n=5)

Table 1. Comparison of expression of genes measured by microarray and real time PCR between H<sub>2</sub>O<sub>2</sub> treated cells and control cells.

Average of 2 microarray data of H<sub>2</sub>O<sub>2</sub> treated cells was compared with 1 microarray data of control cells after normalization. For comparison with real time PCR, 12 RNA from 12 cell culture dishes in 2 groups obtained for microarray were used, and the result of real time PCR was expressed by average of GAPDH and  $\beta$ -Actin. \* p<0.05

| Gene Symbol   | Gene Name                                                                                  | Expression ratio by Microarray (H <sub>2</sub> O <sub>2</sub> /Controll) | Expression ratio by Real Time PCR(H <sub>2</sub> O <sub>2</sub> /Controll) |
|---------------|--------------------------------------------------------------------------------------------|--------------------------------------------------------------------------|----------------------------------------------------------------------------|
| <i>HMOX1</i>  | <i>heme oxygenase (decycling) 1</i>                                                        | 4.73                                                                     | 2.06*                                                                      |
| <i>SOD1</i>   | <i>superoxide dismutase 1, soluble</i>                                                     | 1.22                                                                     | 1.05                                                                       |
| <i>SOD2</i>   | <i>superoxide dismutase 2, mitochondrial</i>                                               | 1.17                                                                     | 1.36*                                                                      |
| <i>SOD3</i>   | <i>superoxide dismutase 3, extracellular</i>                                               |                                                                          | 1.89*                                                                      |
| <i>CAT</i>    | <i>Catalase</i>                                                                            | 0.84                                                                     | 1.08                                                                       |
| <i>GPX1</i>   | <i>glutathione peroxidase 1</i>                                                            | 1.86                                                                     | 1.21*                                                                      |
| <i>GCLC</i>   | <i>glutamate-cysteine ligase, catalytic subunit</i>                                        | 2.28                                                                     | 2.27*                                                                      |
| <i>FOSB</i>   | <i>FBJ murine osteosarcoma viral oncogene homolog B</i>                                    | 906.21                                                                   | 71.81*                                                                     |
| <i>JUNB</i>   | <i>jun B proto-oncogene</i>                                                                | 7                                                                        | 3.65*                                                                      |
| <i>KEAP1</i>  | <i>kelch-like ECH-associated protein 1</i>                                                 | 0.99                                                                     | 1.35                                                                       |
| <i>MAFF</i>   | <i>v-maf musculoaponeurotic fibrosarcoma oncogene homolog F</i>                            | 15.59                                                                    | 9.18*                                                                      |
| <i>CYCS</i>   | <i>cytochrome c, somatic</i>                                                               | 2.63                                                                     | 1.37*                                                                      |
| <i>CIDEA</i>  | <i>cell death-inducing DFFA-like effector a</i>                                            | 8.4                                                                      | 1.40*                                                                      |
| <i>OSGIN1</i> | <i>oxidative stress induced growth inhibitor 1</i>                                         | 12.37                                                                    | 6.38*                                                                      |
| <i>REL</i>    | <i>v-rel reticuloendotheliosis viral oncogene homolog</i>                                  | 1.88                                                                     | 1.67*                                                                      |
| <i>NR4A3</i>  | <i>nuclear receptor subfamily 4, group A members 3</i>                                     | 136.75                                                                   | 24.9*                                                                      |
| <i>MAOA</i>   | <i>monoamine oxidase A</i>                                                                 | 2.6                                                                      | 2.16*                                                                      |
| <i>NFE2L2</i> | <i>nuclear factor (erythroid-derived 2)-like 2 (NRF2)</i>                                  | 1.65                                                                     | 1.85*                                                                      |
| <i>NR4A1</i>  | <i>nuclear receptor subfamily 4, group A, member 1</i>                                     | 7.79                                                                     | 6.02*                                                                      |
| <i>CXCL3</i>  | <i>chemokine (C-X-C motif) ligand 3</i>                                                    | 14.46                                                                    | 10.4*                                                                      |
| <i>GPR68</i>  | <i>G protein-coupled receptor 68</i>                                                       | 6.42                                                                     | 2.08*                                                                      |
| <i>NFKB1A</i> | <i>nuclear factor of kappa light polypeptide gene enhancer in B-cells inhibitor, alpha</i> | 4.35                                                                     | 3.02*                                                                      |
| <i>TP63</i>   | <i>tumor protein p63</i>                                                                   | 34.72                                                                    | 1.86*                                                                      |
| <i>SEPP1</i>  | <i>selenoprotein P, plasma, 1</i>                                                          | 10.55                                                                    | 2.46*                                                                      |
| <i>PMAIP1</i> | <i>phorbol-12-myristate-13-acetate-induced protein 1</i>                                   | 10.11                                                                    | 5.44*                                                                      |
| <i>BTK</i>    | <i>Bruton agammaglobulinemia tyrosine kinase</i>                                           | 9.51                                                                     | 4.35*                                                                      |
| <i>IL8</i>    | <i>interleukin 8</i>                                                                       | 7.51                                                                     | 3.70*                                                                      |
| <i>EGR1</i>   | <i>early growth response 1</i>                                                             | 79.85                                                                    | 25.96*                                                                     |
| <i>NQO1</i>   | <i>NAD(P)H dehydrogenase, quinone 1</i>                                                    | 0.86                                                                     | 1.39*                                                                      |

1 were treated with 100  $\mu$ M H<sub>2</sub>O<sub>2</sub> for 4 hours, then total RNA was extracted and labeled with Cy-  
2 3 then analyzed by Agilent human whole genome microarray. Results were submitted to NCBI  
3 GEO data base with accession number GSE83369.  
4 (<http://www.ncbi.nlm.nih.gov/geo/query/acc.cgi?acc=GSE83369>). Total 2903 genes were up-  
5 regulated more than two times of untreated cells, and 2283 genes were down regulated less than  
6 1/2. Most of the gene were classified unknown or others, the genes classified to nucleotide  
7 metabolism were major group (Table 1, Supplemental Fig. S1, S2). Some of gene expression  
8 was confirmed by RT- real time PCR (Table 1). Antioxidant enzyme *HMOX1*, was up-regulated,  
9 but *SOD1* and *CAT* were not changed. On the other hand, *GPXI* and *GCLC*, a glutathione  
10 synthesis and antioxidant enzymes, were increased. Among the transcription factors that are up-  
11 regulated by H<sub>2</sub>O<sub>2</sub> described by Marinho *et al.* (Marinho *et al.* 2014), *FOSB* and *JUNB* were  
12 strongly up-regulated, suggesting AP-1 pathway was up-regulated. Several apoptosis related  
13 enzymes were also up-regulated. Among the antioxidant pathway (Marinho *et al.* 2014), *KEAP1*  
14 was not changed. There were many genes that function was unknown or slightly known, up-  
15 regulated or down-regulated. Among them, *NR4A3*, kind of orphan receptor, was up-regulated  
16 significantly, therefore, the effect of H<sub>2</sub>O<sub>2</sub> concentration on the expression of this gene was  
17 measured (Fig. 2A). The expression of *NR4A3* was increased by H<sub>2</sub>O<sub>2</sub> concentration until 100  
18  $\mu$ M at 4 hours significantly. Therefore, the expression of *NR4A3* after H<sub>2</sub>O<sub>2</sub> treatment was  
19 measured up to 24 hours (Fig. 2B). It is interesting that *NR4A3* expression was increased rapidly  
20 and decreased to original level by 24 hours, suggesting that the *NR4A3* is early responsible gene  
21 to H<sub>2</sub>O<sub>2</sub> stress, and it is suggested that NR4A3 might have important role in antioxidant defense  
22 system in 1.1B4 cell against H<sub>2</sub>O<sub>2</sub> stress.

23

#### 24 **Knock down of *NR4A3* mRNA by RNA interference**

25 To investigate the roll of *NR4A3* in 1.1B4 cell, *NR4A3* mRNA was knocked down with siRNA.  
26 The 1.1B4 cells were incubated with 5 nM siRNA of *NR4A3* for 48 hours, the mRNA of *NR4A3*  
27 was decreased to 29.6% of control cell (Fig. 3A). The 1.1B4 cells knocked down with siRNA of  
28 *NR4A3* were then treated with 100  $\mu$ M H<sub>2</sub>O<sub>2</sub>, and analyzed cell viability by MTT assay (Fig.  
29 3B). After 72 hours, the viability of siNR4A3 treated 1.1B4 cell was significantly decreased,  
30 and when H<sub>2</sub>O<sub>2</sub> was added to culture medium, the growth was completely stopped.

**A**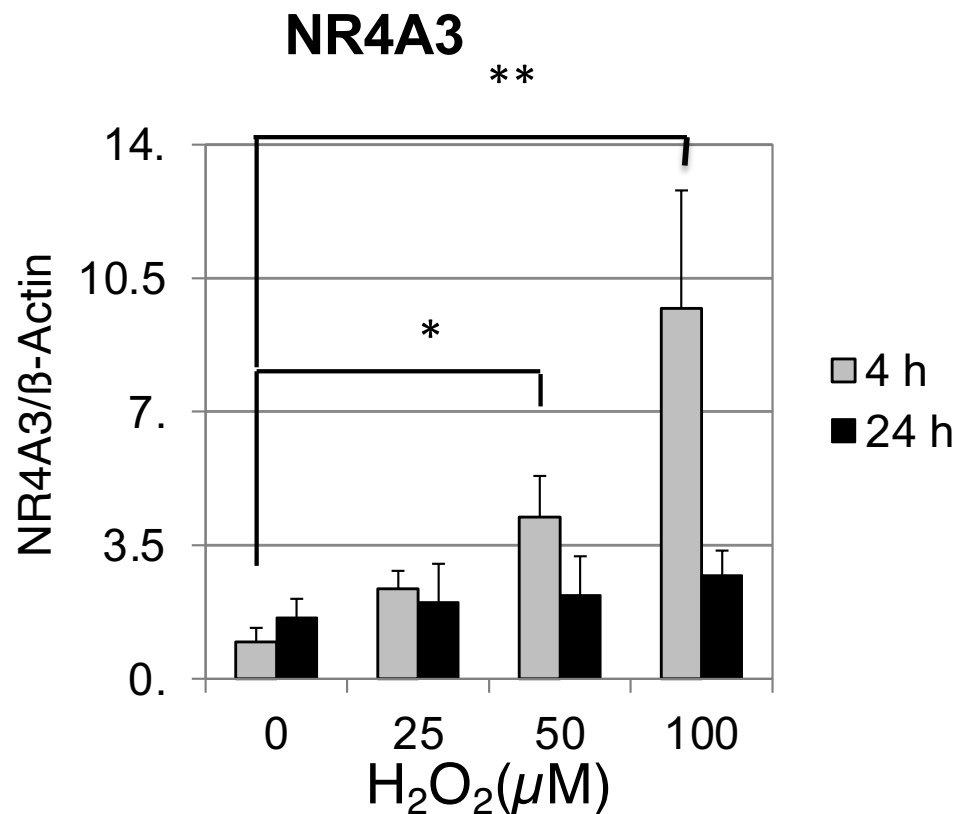**B**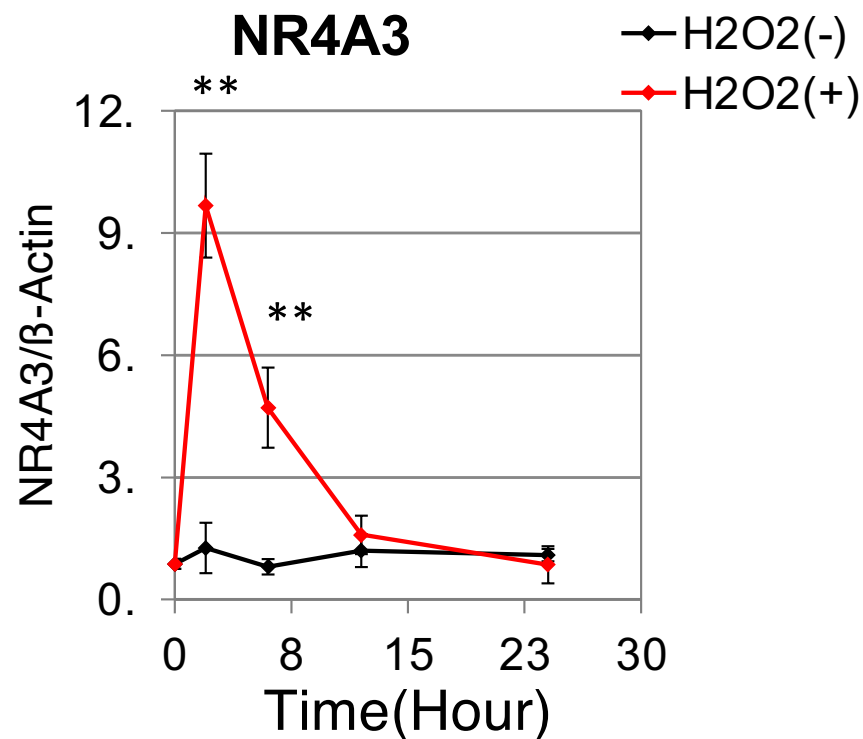

Fig. 2. Effect of H<sub>2</sub>O<sub>2</sub> concentration on *NR4A3* gene expression and time course of expression.

**A**, Human 1.1B4 cell ( $1.0 \times 10^5$  cells/ml) was incubated in 2ml culture medium and 24 hours later medium was changed to individual concentration of H<sub>2</sub>O<sub>2</sub> containing medium, then 4 or 24 hours later total RNA was extracted with Isogen. Expression of *NR4A3* was measured by real time PCR with condition B. n=3. **B**, After addition of 100 μM of H<sub>2</sub>O<sub>2</sub>, cell was incubated individual time and RNA was extracted. n=3. β-Actin was used for control.



**A**

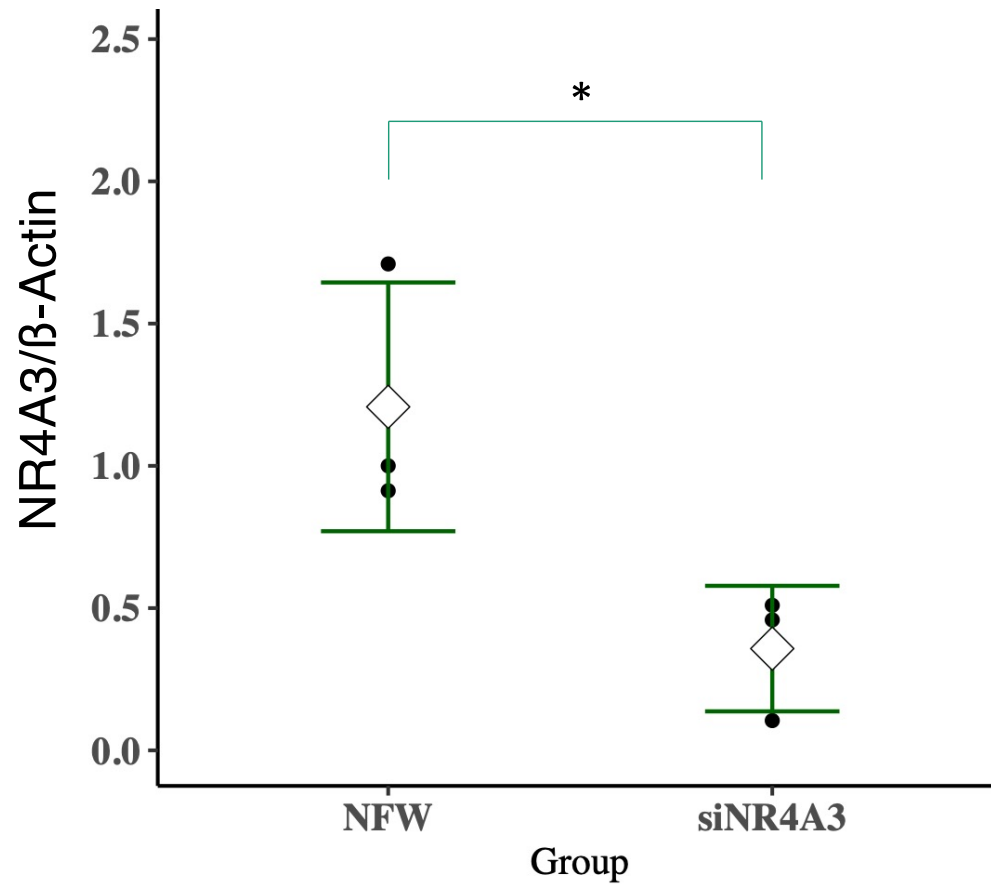

Fig. 3.

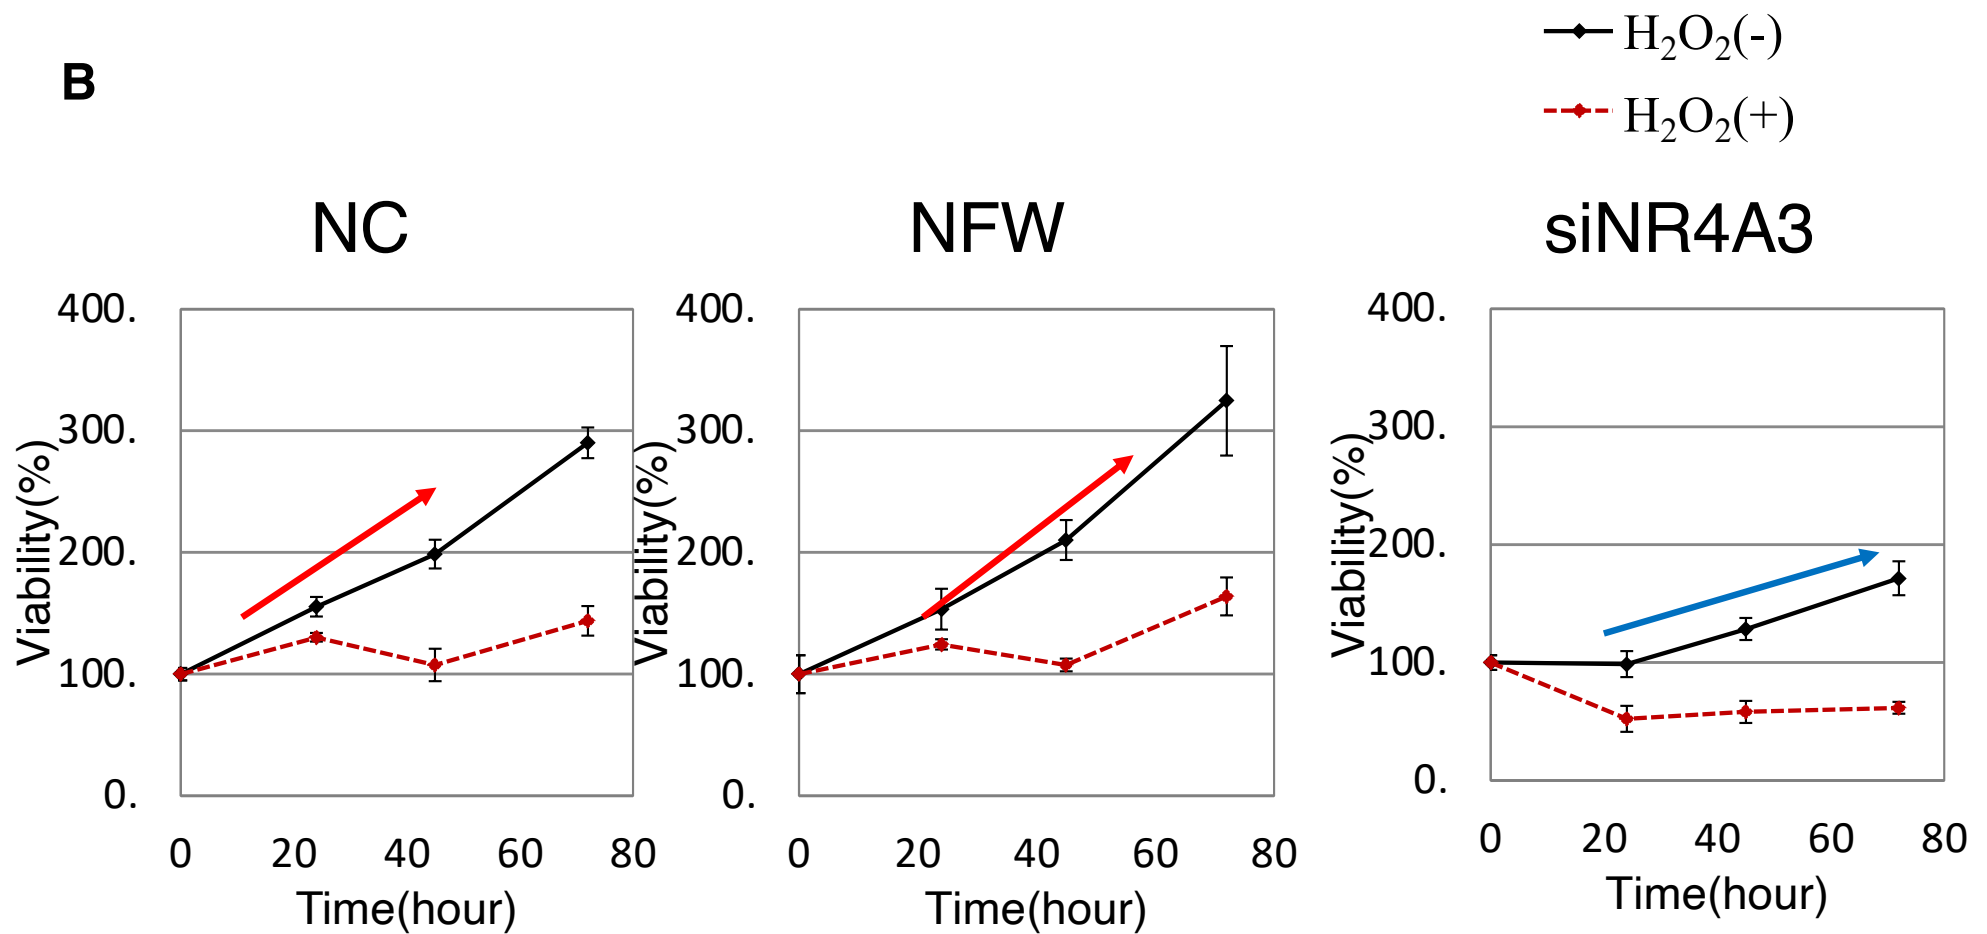

Fig. 3. Effect of *NR4A3* knocked down on the expression of *NR4A3* and cell viability. **A**, After knocked down of *NR4A3* gene in 1.1B4 cell with siRNA, total RNA was extracted and expression of *NR4A3* and  $\beta$ -actin was measured by real time PCR with Cyber green method with condition B.  $n=3$  \* $p<0.05$ . **B**, After knocked down of *NR4A3* gene of 1.1B4 cell, cell was incubated with 100  $\mu$ M of  $H_2O_2$ , and cell viability was measured by MTT assay.  $n=5$ . NC: negative control; NFW: nuclease free water added cell; siNR4A3: siRNA of *NR4A3* treated cell.

1

2 **Comprehensive analysis of gene expression in 1.1B4 cells by DNA microarray after the**  
3 **knock down of *NR4A3* with siRNA**

4 To analyze the role of *NR4A3* in pancreatic islet cell further, we performed comprehensive  
5 analysis of gene expression of 1.1B4 cells by Agilent human DNA microarray after the knocked  
6 down of *NR4A3* mRNA. Data were submitted to NCBI GEO data base with accession number  
7 GSE86924. (<http://www.ncbi.nlm.nih.gov/geo/query/acc.cgi?acc=GSE86924>). We found 1,044  
8 genes were significantly increased over 1.5 folds and 859 genes were significantly decreased  
9 under 0.67 folds (Supplemental Fig. S3A, B). Using those genes, pathway analysis was  
10 performed by KEGG pathway database. (Supplemental Table S2). Many genes in PI3K-Akt  
11 signaling pathway were up-regulated, and Rap1 signaling pathway genes were down-regulated.  
12 Changes in gene expression measured by microarray of transcription factor, related to H<sub>2</sub>O<sub>2</sub>  
13 addition (Marinho et al. 2014), antioxidant genes and major cell growth related genes are also  
14 listed in Table 2. Some of these results were confirmed by real time PCR (Fig. 4A - N,  
15 Supplemental Fig. S4A - H). *NR4A3* expression was down regulated (Fig. 4A) but this group of  
16 orphan receptor, *NR4A1* (Fig. 4B) was not changed and *NR4A2* (Fig. 4C) was up-regulated.  
17 Among the genes of antioxidant enzymes, the expression of *HMOX1* was decreased when  
18 measured by microarray, and confirmed by real time PCR (Fig. 4E), the expression of *HMOX1*  
19 was reduced to 68%. However, *GCLC* (Supplemental Fig. S4E) was only 0.88 times of control,  
20 and *SOD1* (Supplemental Fig. S4F) was not changed significantly. We found interesting gene  
21 expression of antioxidant enzyme of *GLRX* (Fig. 4F). After the knocked down the *NR4A3*,  
22 *GLRX* expression was increased, different from *HMOX1*. *SOD3* was also increased by *NR4A3*  
23 knock down (Fig.4G). Among the transcription factors related to H<sub>2</sub>O<sub>2</sub> oxidation, *MAFA* was  
24 slightly down regulated measured by microarray but was not changed measured by real time  
25 PCR (Supplemental Fig. S4A - D). Other redox sensitive transcription factors were not down  
26 regulated.

27 Gizard *et al.* (Gizard et al. 2011) reported that NOR1 (*NR4A3* or Nur77) is recruited to a nerve  
28 growth factor-induced clone B response element (NBRE, aaaggaca or aaaggtca) site (Philips et  
29 al. 1997). Therefore, whether the *HOMX1* gene has NBRE sequence, or not, was investigated.  
30 The *HMOX1* gene structure was obtained from NCBI database (AY460337). There are two  
31 NBRE like sequence of aaggtca, tentative *NR4A3* responsible element, at second intron (Fig. 5).  
32 Transcription factor responsible element in second intron might works when H<sub>2</sub>O<sub>2</sub> is present in  
33 1.1B4 cell culture medium.

Table 2. Changes of gene expression after siRNA of NR4A3 treatment measured by microarray.

Average of 3 microarray data of siRNA of NR4A3 treated cells after normalization was compared with average of 3 microarray data of control cells.

| Gene symbol                           | Gene name                                                                               | Fold changes (SiRNA vs Cont) | Gene symbol       | Gene name                                                                               | Fold changes (SiRNA vs Cont) |
|---------------------------------------|-----------------------------------------------------------------------------------------|------------------------------|-------------------|-----------------------------------------------------------------------------------------|------------------------------|
| <b>Orphan receptor</b>                |                                                                                         |                              | <b>Cell cycle</b> |                                                                                         |                              |
| NR4A3                                 | nuclear receptor subfamily 4, group A members 3                                         | 0.85                         | E2F1              | E2F transcription factor 2                                                              | 0.66688                      |
| NR4A2                                 | nuclear receptor subfamily 4, group A, member 2                                         | 1.06                         | CDK1              | cyclin-dependent kinase 1                                                               | 0.7342                       |
|                                       |                                                                                         |                              | CDK2              | cyclin-dependent kinase 2                                                               | 0.34304                      |
| <b>Antioxidant responsible</b>        | <b>Transcription Factor</b>                                                             |                              | CDK4              | cyclin-dependent kinase 4                                                               | 0.87803                      |
| MAFA                                  | v-maf musculoaponeurotic fibrosarcoma oncogene homolog A (avian)                        | 0.75                         | CCNA1             | cyclin A1                                                                               | 0.84123                      |
| FOSB                                  | FBJ murine osteosarcoma viral oncogene homolog B                                        | 0.96                         | CCNB1             | cyclin B1                                                                               | 0.72389                      |
| FOS                                   | FBJ murine osteosarcoma viral oncogene homolog                                          | 2.5                          | CCND1             | cyclin D1                                                                               | 0.99547                      |
| JUNB                                  | jun B proto-oncogene                                                                    | 1.02                         | CCNE1             | cyclin E1                                                                               | 0.44222                      |
| JUN                                   | jun proto-oncogene                                                                      | 0.76                         | CCNY              | cyclin Y                                                                                | 0.62658                      |
| KEAP1                                 | kelch-like ECH-associated protein 1                                                     | 0.93                         | CDKN1B            | cyclin-dependent kinase inhibitor 1B (p27, Kip1)                                        | 1.66505                      |
| NFE2L2                                | nuclear factor (erythroid-derived 2)-like 2, NRF2                                       | No data                      | CDKN1B            | cyclin-dependent kinase inhibitor 1B (p27, Kip1)                                        | 1.66505                      |
| CREB5                                 | cAMP responsive element binding protein 5                                               | 2                            |                   |                                                                                         |                              |
| TP53                                  | tumor protein p53                                                                       | 0.83                         | <b>Others</b>     |                                                                                         |                              |
| NOTCH4                                | notch 4                                                                                 | 1.36                         | RAB5B             | member RAS oncogene family (RAB5B)                                                      | 0.54527                      |
| NFKB1                                 | nuclear factor of kappa light polypeptide gene enhancer in B-cells 1                    | 0.95                         | RAP1B             | RAP1B, member of RAS oncogene family                                                    | 0.58507                      |
| NFKB2                                 | nuclear factor of kappa light polypeptide gene enhancer in B-cells 2 (p49/p100)         | 0.77                         | TGFB3             | transforming growth factor, beta 3                                                      | 0.50684                      |
| SP1                                   | Sp1 transcription factor                                                                | 0.8                          | PIK3CA            | phosphoinositide-3-kinase, catalytic, alpha polypeptide                                 | 1.24095                      |
| HIF1A                                 | hypoxia inducible factor 1, alpha subunit (basic helix-loop-helix transcription factor) | 1.02                         | MRAS              | muscle RAS oncogene homolog                                                             | 0.4872                       |
| SREBF1                                | sterol regulatory element binding transcription factor 1                                | 0.76                         | RAP1B             | RAP1B, member of RAS oncogene family                                                    | 0.59426                      |
| HSF1                                  | heat shock transcription factor 1                                                       | 0.84                         | SREBF1            | sterol regulatory element binding transcription factor 1 (A_33_P3222139)                | 0.85885                      |
|                                       |                                                                                         |                              | HIF1A             | hypoxia inducible factor 1, alpha subunit (basic helix-loop-helix transcription factor) | 0.91634                      |
| <b>Antioxidant Responsible Enzyme</b> |                                                                                         |                              | BAD               | BCL2-associated agonist of cell death                                                   | 0.65799                      |
| HMOX1                                 | heme oxygenase (decycling) 1                                                            | 0.48585                      | AKT1              | v-akt murine thymoma viral oncogene homolog 1                                           | 0.85096                      |
| GCLC                                  | glutamate-cysteine ligase, catalytic subunit                                            | 0.88148                      | BAD               | BCL2-associated agonist of cell death                                                   | 2.09416                      |
| GPX1                                  | glutathione peroxidase 1(A_33_P3239849)                                                 | 0.81867                      | FOXO1             | Homo sapiens forkhead box O1 (FOXO1), mRNA [NM_002015]                                  | 1.0298                       |
| GPX1                                  | glutathione peroxidase 1(A_33_P3354322)                                                 | 0.81248                      | FOXO3             | Homo sapiens forkhead box O3 (FOXO3), transcript variant 1, mRNA                        | 1.08933                      |
| CAT                                   | catalase                                                                                | 1.59628                      | GAPDH             | glyceraldehyde-3-phosphate dehydrogenase                                                | 0.73695                      |
| SOD1                                  | superoxide dismutase 1, soluble                                                         | 0.87111                      | TBP               | TATA box binding protein                                                                | 0.93576                      |
| SOD2                                  | superoxide dismutase 2, mitochondrial                                                   | 0.6454                       | ACTB              | actin, beta                                                                             | 0.89854                      |
| SOD3                                  | superoxide dismutase 3, extracellular                                                   | 0.65966                      |                   |                                                                                         |                              |
| GLRX                                  | glutaredoxin (thioltransferase)                                                         | 1.97201                      |                   |                                                                                         |                              |
| GLRX2                                 | glutaredoxin 2                                                                          | 0.83005                      |                   |                                                                                         |                              |
| TXN                                   | thioredoxin                                                                             | 0.82374                      |                   |                                                                                         |                              |
| PMEL                                  | premelanosome protein                                                                   | 1.6221                       |                   |                                                                                         |                              |

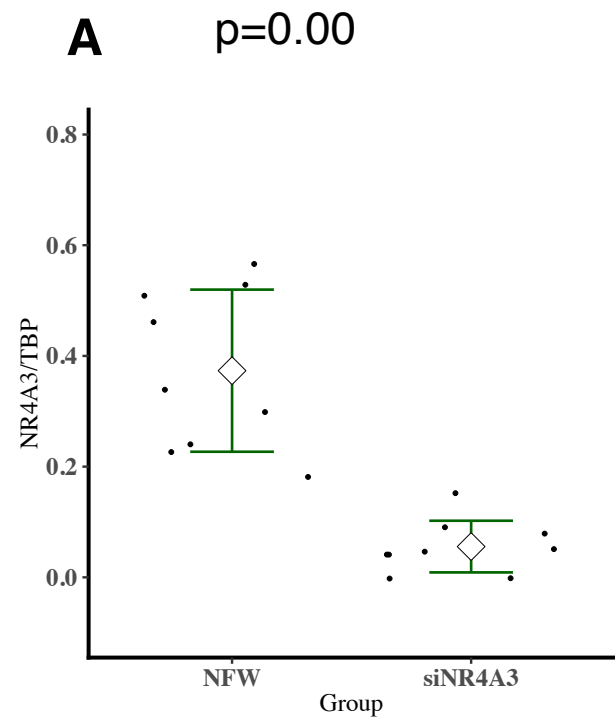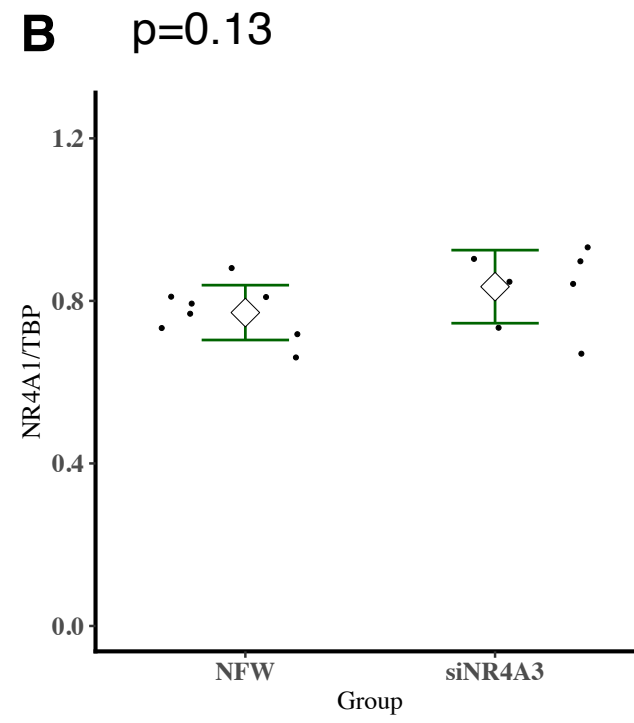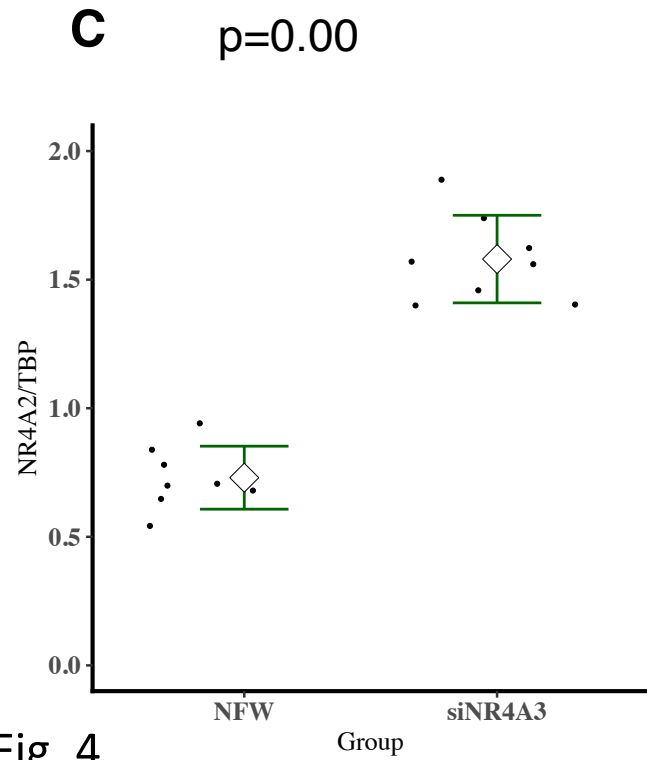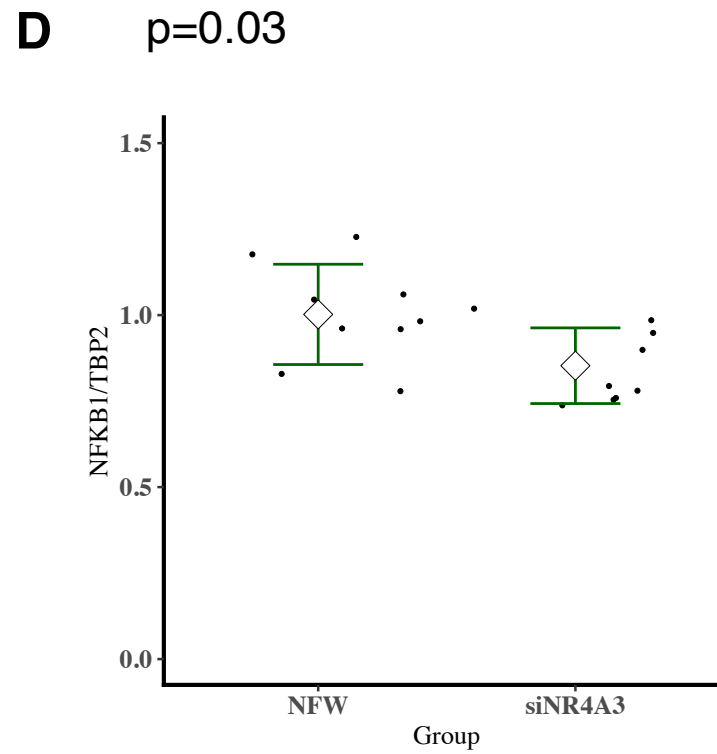

Fig. 4.

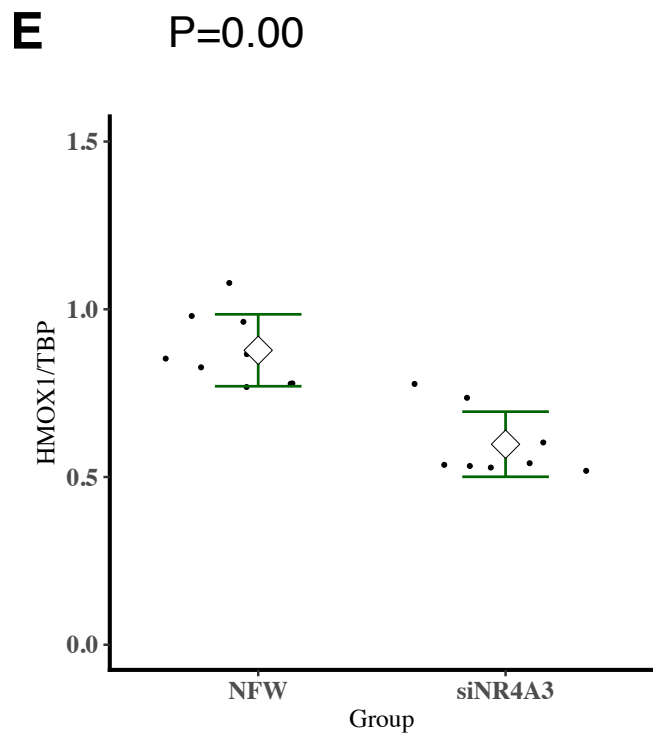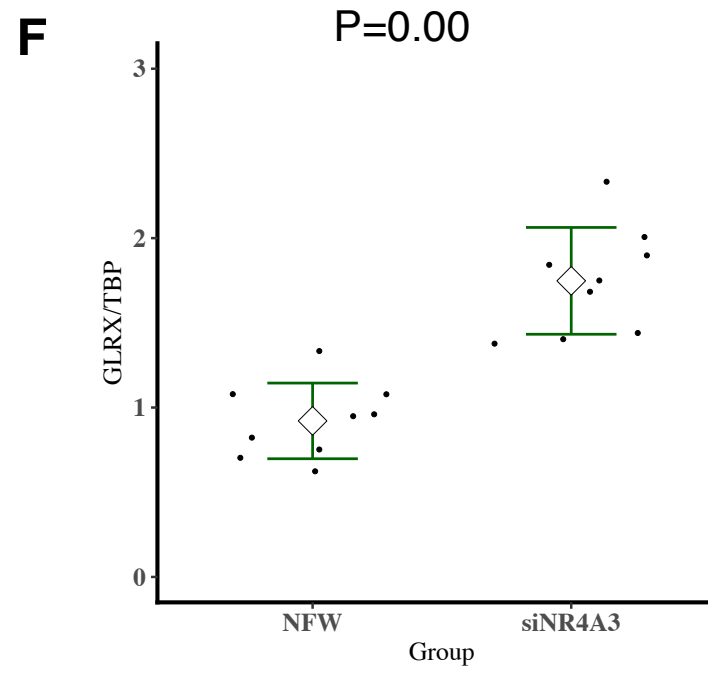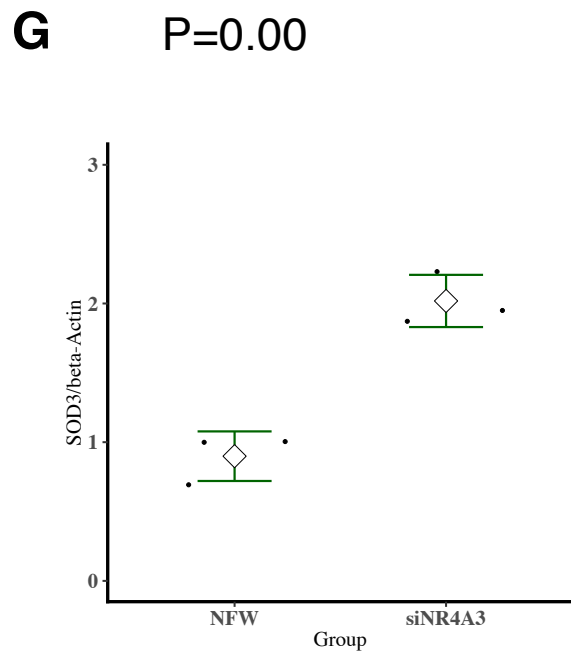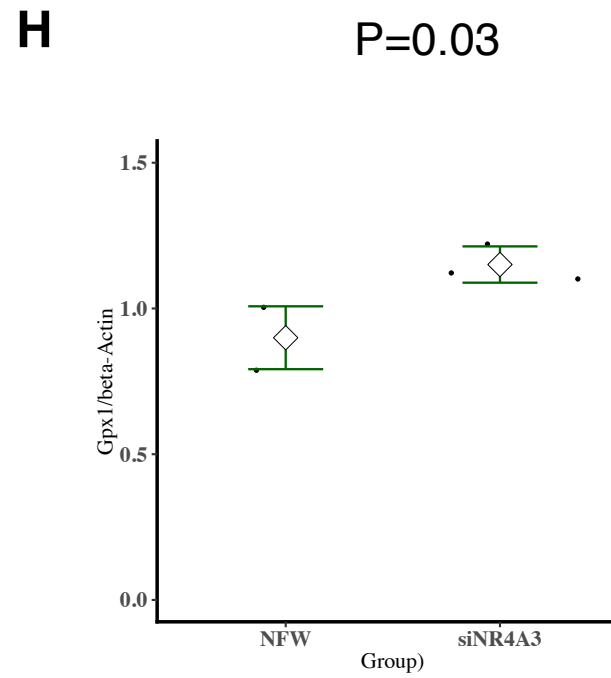

Fig. 4.

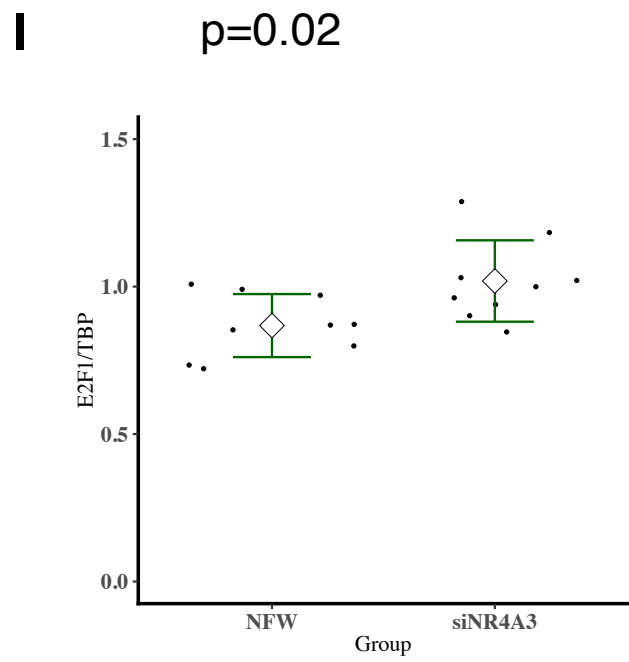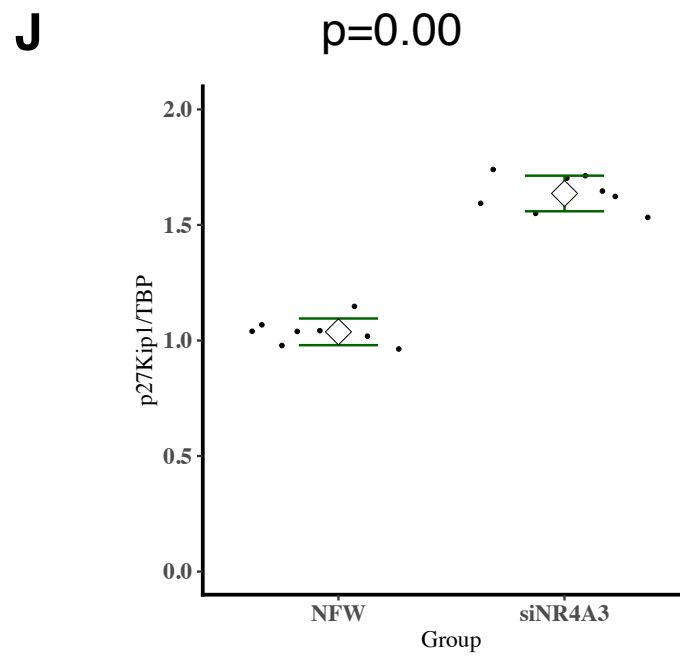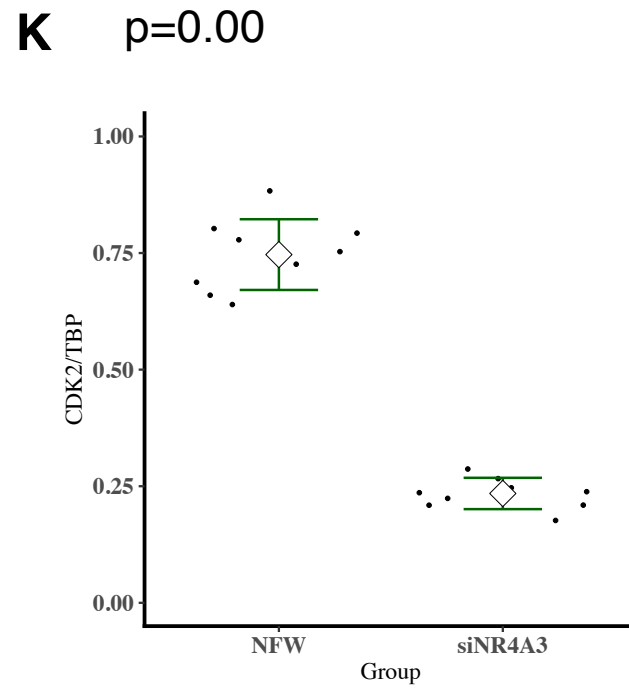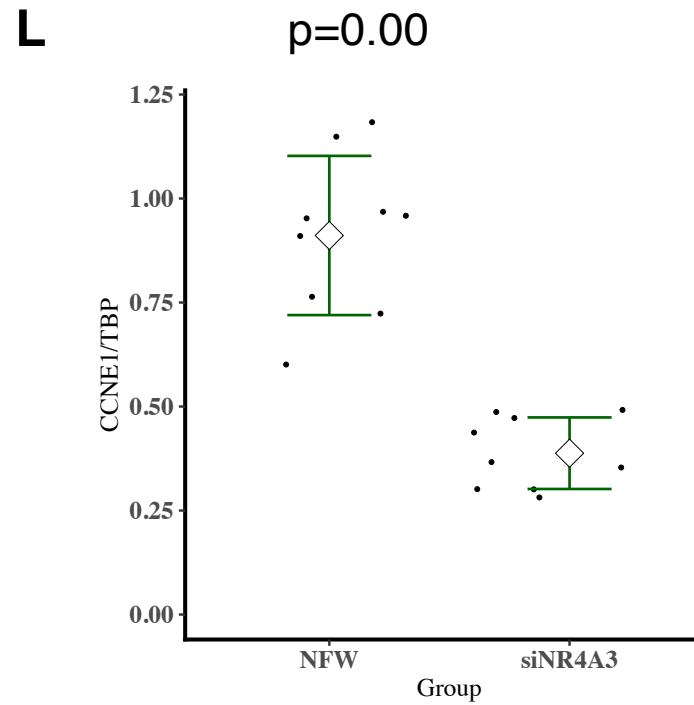

Fig. 4.

**M** p=0.00

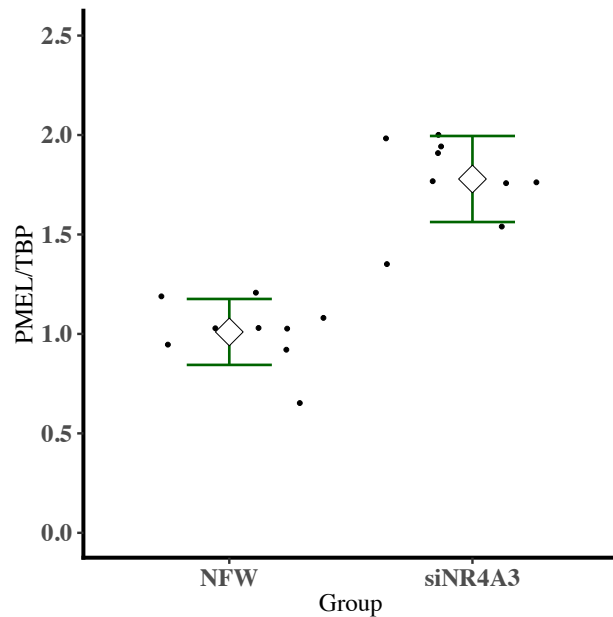

**N** p=0.00

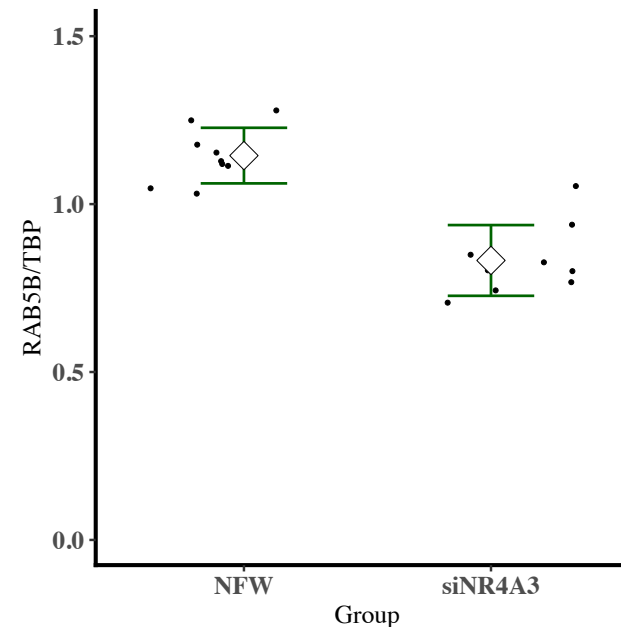

Fig. 4. Changes of Various Gene expression in 1.1B4 Cell after the knocked down of *NR4A3* mRNA measured by real time PCR.

(A) Human 1.1B4 cells were incubated 24hours, half of them (n=9) were added siRNA (siNR4A3) and another half (n=9) were added nuclease free water (NFW), and after 52 hours, mRNA was purified with RNeasy Plus Mini Kit. Expression of *NR4A3* was measured by real time PCR with Taqman method using condition C. TATA binding protein (TBP) mRNA was used for internal control. (B) The *NR4A1* expression, (C) *NR4A2* expression. (D) - (E) *NFKB1* and *HMOX1* respectively. (F) *GLRX* expression (n=8). (G) Human 1.1B4 cells were incubated 24hours, half of them (n=3) were added siRNA (siNR4A3) and another half (n=3) were added NFW, and after 52 hours, mRNA was purified with Isogen reagent and treated with RNase-free DNase. Expression of *SOD3* was measured by real time PCR with Cyber green method using condition B. b-Actin was used for control. (H) Expression of *GPX1* using same method of (G). (I) *E2F1* using same method of (A) (n=8). (J) - (M) *p27Kip1*, *CDK2*, *CCNE1* and *PMEL*, respectively, using same method of (A). (N) *RAB5B* using same method of (A) (n=8).



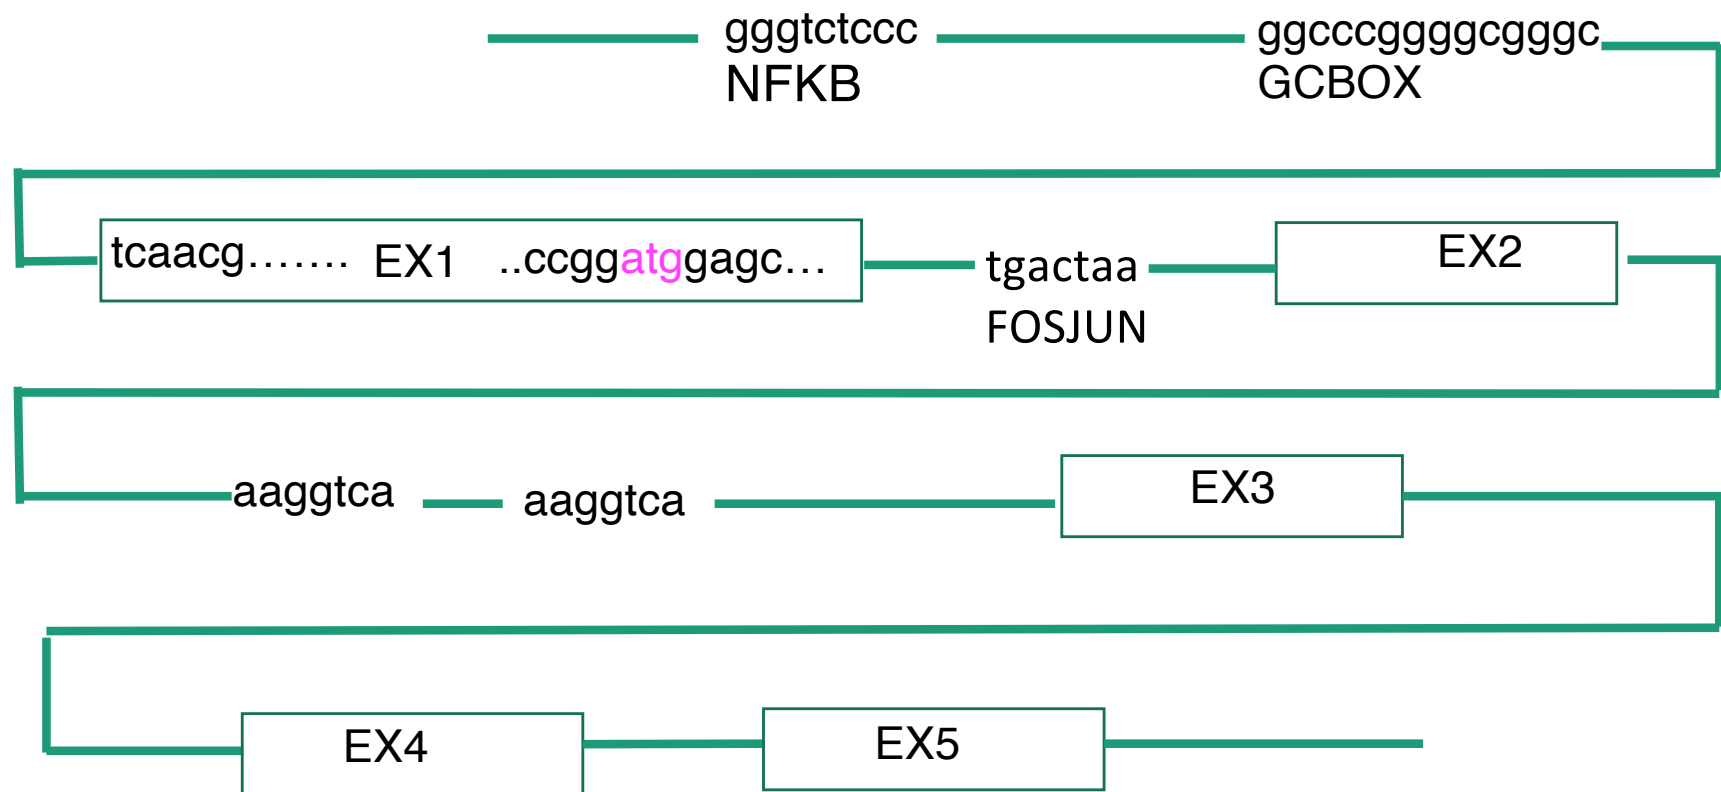

Fig. 5. Gene structure of *HMOX1*.

Human *HMOX1* gene was obtained from PubMed gene (ACCESSION AY460337). NR4A3 binding motif of `aaggtca` were searched and abstract of the gene structure was displayed. NFkB shows NFkB binding motif. FOSJUN shows FOS and JUN binding motif. EX1 etc. shows exon 1 etc.

1 As described before, knock down cells decreased cells growth, therefore, cell cycle regulation  
2 genes that expression was modified by siRNA of *NR4A3*, were investigated. *CCNE1* (*Cyclin E*)  
3 and *CDK2* expressions were decreased remarkably (Table 2). Then those down-regulations were  
4 confirmed by RT-real time PCR (Fig. 4K, L). *CDK2* and *CCNE1* expression were decreased  
5 strongly compared with un-treated cell. To investigate the mechanism, gene structure of *CDK2*  
6 and *CCNE1* were analyzed (Supplemental Fig. S5A, B and S6). There was no aaggtca at up-  
7 stream of *CDK2*, however, down-stream of *CDK2*, there is aaggtca sequence. This area is also  
8 up-stream of the gene of *RAB5B*, therefore, the effect of siRNA of *NR4A3* on this *RAB5B*  
9 expression was investigated. There is also *PMEL* is near this area, the expression of *PMEL* was  
10 also measured. As shown in Fig 4M and N, those two genes expression were also decreased or  
11 increased by siRNA of *NR4A3*. It is, therefore, suggested that *NR4A3* promotes proliferation  
12 through activating *Rap1* signaling pathway, therefore, it is also suggested that the *NR4A3*  
13 contribute to homeostasis against extracellular stress such as oxidative stress.

14

## 15 DISCUSSION

16 It is known that pancreatic islet  $\beta$ -cell weakly express antioxidant enzymes, therefore, oxidative  
17 stress enhances diabetes mellitus. As shown in this experiment of microarray of  $H_2O_2$  treated  
18 1.1B4 cell, among the antioxidant enzymes, *HMOX1*, *GPXI* and *GCLC* were up-regulated  
19 (Table 1). Other major antioxidant enzymes were not up-regulated, for example, *SOD1* and *CAT*  
20 were not induced by  $H_2O_2$  addition, therefore, those *HMOX1*, *GPXI* and *GCLC* enzymes are  
21 responsible for antioxidant defense system in pancreatic cell, and those are very important  
22 enzymes for defending against oxidative stress at diabetes. Alam and Cook (Alam and Cook  
23 2007) described that there are 4 pathways that regulates *HMOX1* gene expression at oxidative  
24 stress. But here, not only those 4 pathway, we showed that *HMOX1* and *NR4A3* were up-  
25 regulated when  $H_2O_2$  was added, and the expression of *HMOX1* was down-regulated when  
26 *NR4A3* was knocked down by siRNA resulting loss of antioxidative resistance. Furthermore,  
27 the second intron of *HMOX1* has NBRE like sequence of aaggtca. Therefore, we concluded that  
28 the *NR4A3* is antioxidant responsible transcription factor and regulates *HMOX1* expression at  
29 oxidative stress. Not only 1.1B4 cell, *NR4A3* expression was also increased in HUCF2 cell at  
30 oxidative stress (Shimizu et al. 2015). Therefore, we propose that the *NR4A3* is new oxidative  
31 stress responsible transcription factor not listed before (Marinho et al. 2014), and this pathway  
32 is major antioxidant pathway in 1.1B4 cell (Graphical abstract). *FOSB* is also up-regulated by

# Graphical abstract

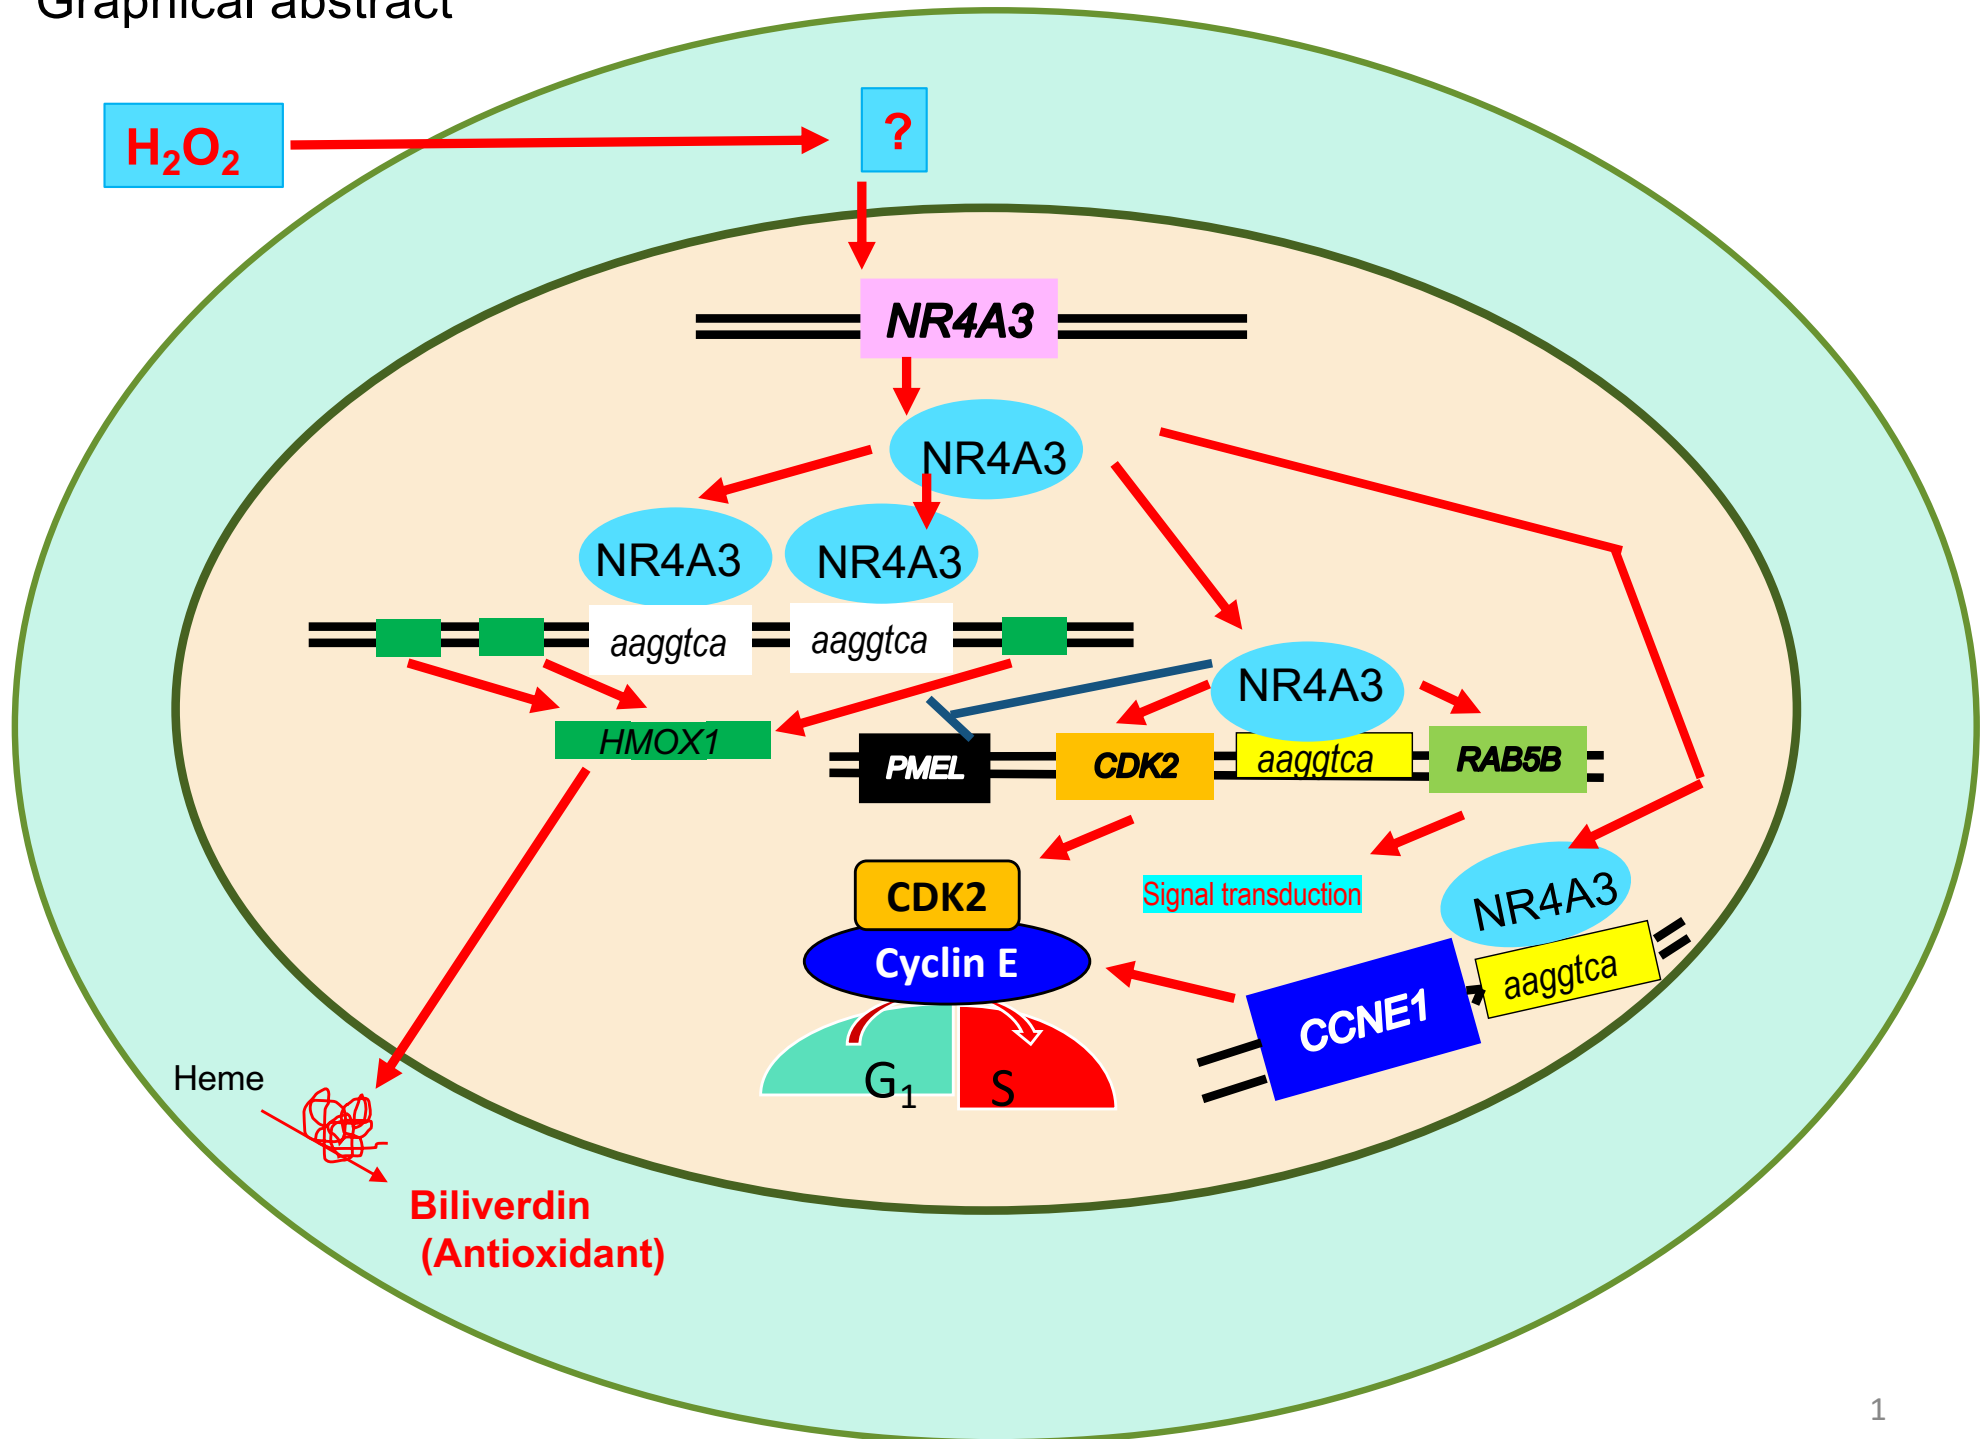

Hydrogen peroxide induces NR4A3 and binds to aaggtca sequence of HMOX1, and increased transcription of HMOX1. Resulting heme oxygenase produces biliverdin, antioxidants, from heme. NR4A3 also bind to aaggtca sequence of CDK2 and CCNE1, resulting CDK2 and Cyclin E. CDK2 bind to cyclin E and cell goes from G1 to S phase.

1 H<sub>2</sub>O<sub>2</sub> in this experiment, therefore, FOS pathway might be also another major antioxidant  
2 pathway.

3 There are two NBRE like sequence of aaggtca in *HMOX1*. NBRE contains aggtca which is  
4 typically recognized by retinoic acid receptor/retinoid X receptor (RAR/RXR) subfamily, and it  
5 also includes two aa residues preceding this hexanucleotide (Philips et al. 1997). On the other  
6 hand, NR4A1 and NR4A2 forms heterodimer with RXR and binds to direct repeat of aggtca  
7 (Safe et al. 2016). Therefore, we propose aaggtca is NR4A3 responsible element.

8

9 Micro-array analysis has shown that knock down of *NR4A3* decreased *CDK2* and *CCNE1*  
10 (*cyclin E*) expression (Table 2). This result confirmed by real time PCR and promotor region  
11 analysis (Fig. 4K and 4L, Supplemental Fig. S5A, B and S6). These results show that *NR4A3* is  
12 key transcription factor not only for antioxidant system but also for cell cycle control in 1.1B4  
13 cell. Tessem *et al.* (Tessem et al. 2014) demonstrate that *E2F1* and *CCNE1* are key cell cycle  
14 inducers. Our result of *cyclin E* consistent with Tessem results, but our results showed *E2F1*  
15 expression was only slightly increased in *NR4A3* knock down cell (Fig. 4I). Therefore, it is  
16 suggested that NR4A3 directly controls *cyclin E* and *CDK2*, not via *E2F1*.

17

18 Robertson (Robertson 2010) described that main stays of therapy for type 2 diabetes involve  
19 drugs that are insulin-centric, i.e., they are designed to increase insulin secretion and decrease  
20 insulin resistance. The mechanism for this unrelenting deterioration of  $\beta$ -cell function is related  
21 to chronic oxidative stress. This suggests that drug discovery should not exclusively focus on  
22 insulin-centric targets, but also include glucose-centric strategies, such as antioxidant protection  
23 of the  $\beta$ -cells. This may facilitate repair of  $\beta$ -cells undergoing damage by oxidative stress  
24 secondary to chronic hyperglycemia. Furthermore, Gao *et al.* (Gao et al. 2014) have shown that  
25 over expression of *NR4A3* results in down-regulation of insulin gene transcription and insulin  
26 secretion. It is suggested that oxidative stress up-regulated *NR4A3* expression resulting down-  
27 regulation of insulin secretion. Therefore, antioxidant material might recover from islet damage.  
28 For this aim, many antioxidants were used for diabetes therapy. For example, Cinnamtannin D-  
29 1, one of the main A-type procyanidin oligomers in *C. tamala*, was discovered to dose-  
30 dependently reduce palmitic acid- or H<sub>2</sub>O<sub>2</sub>-induced apoptosis and oxidative stress in INS-1 cells,  
31 MIN6 cells, and primary cultured murine islets (Wang et al. 2014), however, antioxidant drugs  
32 were not in use for human diabetes. Therefore, we screened new antioxidant from food stuff for

1 potential therapy use, and recently found strong antioxidant Zeylaniin A from edible vegetable  
2 (Nomi et al. 2012). This polyphenol may be used for diabetes treatment.

3  
4 For microarray experiment, Agilent array was used and confirmed by real time PCR. Some  
5 times other type of microarray shows different data from real time PCR and shows false positive  
6 data, but Agilent array used here shows very co-related data to real time PCR as far as we  
7 measured in this experiment. And three microarray data of same conditions showed very similar  
8 data. Use of internal control gene for real time PCR was not easy, because many house keeping  
9 genes are known to change their transcription depend on the conditions. Therefore, average of  
10 two house keeping genes of *GAPDH* and *β-actin* were used for H<sub>2</sub>O<sub>2</sub> experiment. *TBP* was also  
11 used for siRNA treated cell because *TBP* was not changed by siNR4A3 treatment measured by  
12 microarray (Table 2).

## 14 **METHODS**

### 15 **Reagents**

16 RPMI-1640 medium (GIBCO, Tokyo or Sigma, Tokyo), FBS (CELLect FBS, MP Bomedical  
17 Japan, Tokyo Japan, LOT#7997K or Biowest, Nuaille, France, Lot.No:S05831S1820), Penicilin  
18 (50 IU/ml) - Streptomycine (50 micro g/ml) ( ICN Biomedicals, Irvine, California, United  
19 States), 96 well plate (IWAKI, Tokyo, Japan), NR4A3 Silencer Select siRNA (Applied  
20 Biosystems - Thermo Fisher Scientific Japan, Tokyo, siRNA ID : s15542), Silencer Select  
21 Negative Control #1 siRNA, Nuclease Free Water and Lipofectamine 2000 (Applied  
22 Biosystems - Thermo Fisher Scientific Japan, Tokyo). RNeasy Plus Mini Kit (Qiagen, Tokyo,  
23 Japan), Bio-analyzer (Agilent Technology, Palo Alto, CA, USA). Isogen reagent and RNase-  
24 free DNase (Nippon gene, Toyama, Japan). Agilent Whole Human Genome Oligo Microarray  
25 4x44K Ver. 2.0 (Agilent Technology, Palo Alto, CA, USA) Reagents for microarray (Agilent  
26 Technology, Palo Alto, CA, USA). Agilent G2565BA Microarray Scanner System (Agilent  
27 Technology, Palo Alto, CA, USA). The scanned images were analyzed with Feature Extraction  
28 Software 9.5.1.1 (Agilent Technology, Palo Alto, CA, USA) using default parameters (protocol  
29 GE1-v5\_95\_feb07 and Grid: 014850\_D\_F\_20101031). Spot Fire software (TIBCO, NTTCom,  
30 Tokyo, Japan) and the GeneSpringGX10 v 7.3.1 (Agilent Technology, Palo Alto, CA, USA).  
31 DNaseI-treated total RNA with M-MLV reverse transcriptase (Invitrogen, Carlsbad, CA, USA)

1 and Oligo (dT) 15 primer (Promega, Madison, WI, USA). STEP ONE PLUS Real Time PCR  
2 system (Applied Biosystems Japan, Tokyo, Japan), SYBR GREEN PCR Master Mix (Applied  
3 Biosystems Japan, Tokyo, Japan). Takara Premix Ex Taq (Probe qPCR) (TaKaRa, Kyoto,  
4 Japan), Designs of PCR probes: Universal Probe Library Assay Design Center at Roche  
5 (<http://www.universalprobelibrary.com>). ABI PRISM 7900HT Sequence Detection System  
6 (Applied Biosystems, Tokyo, Japan).

### 7 **Biological Resources: Human pancreatic islet derived cell, 1.1B4**

8 Islet derived hybrid cell of 1.1B4 (ECACC No. 10012801) formed by the electrofusion of a  
9 primary culture of human pancreatic islets with PANC-1, a human pancreatic ductal carcinoma  
10 cell line (ECACC catalogue number 87092802), was obtained from DS Pharma Biomedical Co.,  
11 Ltd., Osaka, Japan, and cultured in RPMI-1640 medium (GIBCO, Tokyo or Sigma, Tokyo,  
12 Japan) supplemented with 10% FBS (CELLelect FBS, MP Bomedical Japan, Tokyo Japan,  
13 LOT#7997K or Biowest, Nuaille, France, Lot.No:S05831S1820) with Penicilin (50 IU/ml) -  
14 Streptomycine (50 µg/ml) ( ICN Biomedicals, Irvine, CA, USA) in humidified air at 37 °C with  
15 5% CO<sub>2</sub>.

16

### 17 **Cell toxicity of H<sub>2</sub>O<sub>2</sub> and the effect of H<sub>2</sub>O<sub>2</sub> on gene expression of 1.1B4**

18 The cells of 1.1B4 were cultured in 96 well plate (IWAKI, Tokyo, Japan) at  $6.0 \times 10^3$   
19 cells / well with RPMI-1640 medium for 24 hours, then 0, 10, 20, 30, 40, 50, 100, 200  
20 µM H<sub>2</sub>O<sub>2</sub> was added to medium, and cell viability was analyzed at 24, 48 and 72 hours  
21 by MTT (3-(4,5-dimethylthiazol-2-yl)-2,5-diphenyltetrazolium bromide) colorimetric  
22 assay (Mosmann 1983). We found that there was no toxicity up to 150 µM H<sub>2</sub>O<sub>2</sub>. Next,  
23 we examined the effect of H<sub>2</sub>O<sub>2</sub> on gene expression by real time PCR. Human 1.1B4  
24 cell ( $1.0 \times 10^5$  cells/ml) was incubated in 2ml culture medium and 24 hours later  
25 medium was changed to 25, 50 and 100 µM H<sub>2</sub>O<sub>2</sub> containing medium, then 4 or 24  
26 hours later total RNA was extracted with Isogen. Expression was measured by real time  
27 PCR with condition B. Cells of 1.1B4 were also treated with 100 µM H<sub>2</sub>O<sub>2</sub> and we  
28 analyzed gene expression after the exposure to H<sub>2</sub>O<sub>2</sub> for 2, 6, 12, 24 hours.

29

1     **Knock down of NR4A3 mRNA by RNA interference**

2     NR4A3 Silencer Select siRNA (ABI, siRNA ID: s15542) was used for knocked down the  
3     *NR4A3* mRNA, and Silencer Select Negative Control #1 siRNA (ABI) and Nuclease Free Water  
4     (ABI) were used for negative control. *NR4A3* mRNA of 1.1B4 cells was knocked down by  
5     incubating with 5 nM siRNA and 0.1 % of Lipofectamine 2000 for 48 h. Total RNA was  
6     isolated by Isogen then mRNA was measured as described before. The 1.1B4-siNR4A3 treated  
7     cells or control cells were treated with or without 100  $\mu$ M H<sub>2</sub>O<sub>2</sub>, and cell viability was assayed  
8     by MTT assay.

9

10    **Extraction and purification of mRNA**

11    For micro-array, total RNA was isolated using the RNeasy Plus Mini Kit (Qiagen, Tokyo,  
12    Japan). The purity of RNA was assessed by a Bio-analyzer (Agilent Technology, Palo Alto, CA,  
13    USA) before microarray analysis. The RNA thus obtained was also used for real time PCR. For  
14    only real time PCR use, total RNA was extracted with Isogen reagent (Nippon gene, Toyama  
15    Japan) as described previous paper (Oba et al. 2006) and treated with RNase-free DNase  
16    (Nippon gene, Toyama, Japan).

17

18    **Global analysis of gene expression by DNA microarray in 1.1B4 cells**

19    **(Experiment A)** Pancreatic derived 1.1B4 cell was seeded as  $1.5 \times 10^5$  cells / ml to RPMI-1640  
20    medium (GIBCO, Tokyo, Japan) in 6 well plate, and 24 hours later, cell was incubated with 100  
21     $\mu$ M H<sub>2</sub>O<sub>2</sub> 4 hours, then total RNA was extracted with RNeasy Mini Kit (Qiagen, Tokyo) (n=6  
22    for control and treated respectively). The quality of all 12 RNA samples was checked by Agilent  
23    RNA 6000 Nano Reagents Part1 (Agilent Technologies, Tokyo, Japan), and 3 samples of RNA  
24    were combined to one microarray sample, then analyzed by Agilent human microarray by the  
25    protocol of manufacture. In brief, Cy3-labeled cRNA was generated from 200 ng input total  
26    RNA using Agilent's Low Input Quick Amp Labeling Kit (Agilent Technologies, Tokyo,  
27    Japan). cDNA was generated with the primer containing a T7 polymerase promoter, and then  
28    was transcribed into cRNA in accompany with the dye labeling. For every type of cell, 1.65  $\mu$ g  
29    cRNA from each labeling reaction was hybridized to the Agilent Whole Human Genome Oligo  
30    Microarray (Agilent Technologies, Tokyo, Japan). The Whole Human Genome Oligo  
31    Microarray is in a 4 x 44k slide format and each block represents more than 41,000 unique



1 human genes and transcripts. After hybridization, the slides were washed and then scanned with  
2 the Agilent G2565BA Microarray Scanner System (Agilent Technologies, Tokyo, Japan). The  
3 scanned images were analyzed with Feature Extraction Software 9.5.1.1 (Agilent Technologies,  
4 Tokyo, Japan) using default parameters (protocol GE1-v5\_95\_feb07 and Grid:  
5 014850\_D\_F\_20101031) to obtain background subtracted and spatially detrended Processed  
6 Signal intensities. Features flagged in Feature Extraction as Feature Non-uniform outliers were  
7 excluded. Data were further normalized using Gene Spring GX10 using default parameters of  
8 recommended protocol with Median shift normalization to the 75th percentile and baseline  
9 transformed to the median of all samples. Data normalization and filtering was performed using  
10 Spot Fire software (TIBCO, NTTCom, Tokyo, Japan) and the Gene Spring v 7.3.1 (Agilent  
11 Technologies, Tokyo, Japan). After the reading, one of microarray for control sample was  
12 scratched, therefore, the gene expression was compared average of two treated array samples vs  
13 one control sample. These 12 RNA samples were also used for real time PCR analysis.

14 **(Experiment B)** The microarray experiment was designed as follows. Human 1.1B4 cells (n=24)  
15 were incubated in RPMI-1640 medium 24hours, half of them (n=12) were added siRNA  
16 (siNR4A3) and another half (n=12) were added nuclease free water (NFW), and 48 hours later 3  
17 cells of each group were added H<sub>2</sub>O<sub>2</sub> to 100 mM. Those 6 cells samples were stored but not  
18 used for this paper. After 52 hours, mRNA of remaining 18 cells was purified with RNeasy Plus  
19 Mini Kit. The quality of mRNA was checked by Bio-analyzer, 3 mRNA samples were  
20 combined to one microarray sample (3 knocked down microarray samples and 3 control  
21 microarray samples), and applied on microarray analysis with Agilent Whole Human Genome  
22 Oligo Microarray 4 x 44k. The expression was analyzed by Gene-spring software and Spot fire  
23 software. Average of 3 array samples treated by H<sub>2</sub>O<sub>2</sub> was compared to average of 3 array  
24 samples without treated by H<sub>2</sub>O<sub>2</sub>. For real time PCR, 18 RNA samples were used individually.  
25 Real time PCR with Taqman method was used (condition C). *TBP* mRNA was used for internal  
26 control. All the sample-labeling, hybridization, washing, and scanning steps were conducted  
27 following the manufacturer's specifications as described before.

28

## 29 **Real-time RT-PCR**

30 The cDNAs were synthesized from DNaseI-treated total RNA with M-MLV reverse  
31 transcriptase (Invitrogen, Carlsbad, CA, USA) and Oligo (dT) 15 primer (Promega, Madison,  
32 WI, USA) according to the manufacturer's instructions. Analysis of gene expression was

1 performed with a STEP ONE PLUS Real Time PCR system (Applied Biosystems Japan, Tokyo,  
2 Japan) using SYBR GREEN PCR Master Mix (Applied Biosystems Japan, Tokyo, Japan) and  
3 the primers listed in Supplemental Table S1. **Condition A**, 0.2  $\mu$ l of cDNA was mixed with 0.1  
4  $\mu$ l forward primer (50 pmol / ml), 0.1  $\mu$ l reverse primer (50 pmol / ml), 4.7  $\mu$ l water and 5  $\mu$ l  
5 2 $\times$ SYBR Green PCR Master MIX. Reactive condition was first incubated at 50  $^{\circ}$ C for 2 min  
6 and 95  $^{\circ}$ C for 10 min, followed by 40 cycles at 95  $^{\circ}$ C for 15 sec and 60  $^{\circ}$ C for 1 min, then final  
7 of 95  $^{\circ}$ C for 15 sec, 60  $^{\circ}$ C for 15 sec and 95  $^{\circ}$ C for 15 sec. Normalization of the data was  
8 achieved by quantitating the cycle time at an arbitrary fluorescence intensity in the linear  
9 exponential phase using Step One Plus Real-Time system Software (Applied Biosystems Japan,  
10 Tokyo, Japan) by calculating the ratio of the relative concentration of each mRNA relative to  
11 that of average of *GAPDH* and  $\beta$ -*actin* or  $\beta$ -*actin* only. To confirm amplification specificity, the  
12 PCR products from each primer pair were subjected to a melting curve analysis. The relative  
13 quantification of gene expression was computed by using the comparative Ct (threshold cycle)  
14 method. **Condition B**, 0.2  $\mu$ l of cDNA was mixed with 1  $\mu$ l forward primer (50  $\mu$ M), 1  $\mu$ l  
15 reverse primer (50  $\mu$ M), 2.8  $\mu$ l water and 5 ml 2 $\times$ SYBR Green PCR Master MIX with same  
16 reaction condition.

17 **Condition C** was performed with a TaqMan method. Briefly, the synthesized cDNA products  
18 were subjected to real-time PCR in a reaction mixture (10  $\mu$ l) containing Takara Premix Ex Taq  
19 (Probe qPCR) (TaKaRa, Kyoto, Japan), 200 nM hydrolysis probes and 200 nM PCR primers.  
20 Two  $\mu$ l of cDNA was mixed with 5  $\mu$ l of Premix Ex Taq (2 $\times$ conc.), 0.2  $\mu$ l of ROX Reference  
21 Dye (50X), 0.2 $\mu$ l of forward primer (10  $\mu$ M), 0.2  $\mu$ l of reverse primer (10  $\mu$ M) and 0.2  $\mu$ l of  
22 TaqMan Probe (10  $\mu$ M). Designs of PCR probes and primers were obtained from the Universal  
23 Probe Library Assay Design Center at Roche (<http://www.universalprobelibrary.com>)  
24 (Supplemental Table S1). Real-time amplifications were performed on the ABI PRISM 7900HT  
25 Sequence Detection System (Applied Biosystems, Tokyo, Japan). The settings for the thermal  
26 profile were an initial denaturation (30 s at 95 $^{\circ}$ C) followed by 40 amplification cycles:  
27 denaturation for 5 s at 95 $^{\circ}$ C; annealing for 30 s at 60 $^{\circ}$ C. Gene-specific standard curves were  
28 generated using 2-fold serial dilutions of cDNA. The amount of target mRNA was expressed as  
29 the ratio to *TBP* mRNA. Primers are listed in Table S1.

30

31 **Classification of genes**

1 The genes up-regulated or down-regulated significantly were categorized by panther process  
2 name of the gene prepared by Agilent data for human microarray.

3

#### 4 **Pathway analysis and statistical analysis**

5 The genes up-regulated significantly were submitted to the KEGG pathway analysis at Kyoto  
6 University. Statistical analysis was performed with R (R Core Team; R: A language and  
7 environment for statistical computing. R Foundation for Statistical Computing, Vienna, Austria;  
8 2017 URL <https://www.R-project.org/>). For comparisons between groups, analysis of  
9 covariance (ANNOV method and t test for post hoc test) was used to assess the statistical  
10 significance of mean differences between groups, and pairwise t test was used for post hoc  
11 testing. The significance levels were set at  $Pr(>F) 0.05$  for anova, and  $p < 0.05$  and  $p < 0.01$  for  
12 post hoc testing.

13

14

#### 15 **DATA ACCESS**

16 Microarray data of H<sub>2</sub>O<sub>2</sub> treated cells is available in NCBI GEO data base with accession  
17 number GSE83369. (<http://www.ncbi.nlm.nih.gov/geo/query/acc.cgi?acc=GSE83369>).

18 Microarray data of siRNA of NR4A3 treated cells is available in NCBI GEO data base with  
19 accession number GSE86924. (<http://www.ncbi.nlm.nih.gov/geo/query/acc.cgi?acc=GSE86924>).

20

#### 21 **COMPETING INTEREST STATEMENT**

#### 22 **CONFLICT OF INTEREST**

23 No potential conflicts of interest relevant to this article were reported. Declarations of interest:  
24 none. The datasets generated during and/or analyzed during the current study are available from  
25 the corresponding author or author of E.U. upon reasonable request. The datasets are also  
26 available from NCBI GEO data base. Disclosure Statement: The authors have nothing to  
27 disclose.

28

1

## 2 **ACKNOWLEDGEMENTS**

3 This work was supported by Japan Society for the Promotion of Science (JSPS) Grant-in-Aid  
4 for Scientific Research (A, B and C) [grant numbers 17500533, 20300243, 24240096,  
5 25282020], and Grant-in-Aid for Challenging Exploratory Research [grant number 21650196].  
6 Founders had no role in study design, data collection and analysis, decision to publish, or  
7 preparation of the manuscript.

8

## 9 **SUPPLEMENTARY DATA**

10 Supplementary Data are available.

11

## 12 **REFERENCES**

- 13 Alam J, Cook JL. 2007. How many transcription factors does it take to turn on the heme  
14 oxygenase-1 gene? *Am J Respir Cell Mol Biol* **36**: 166-174.
- 15 Gao W, Fu Y, Yu C, Wang S, Zhang Y, Zong C, Xu T, Liu Y, Li X, Wang X. 2014. Elevation  
16 of NR4A3 expression and its possible role in modulating insulin expression in the pancreatic  
17 beta cell. *PLoS One* **9**: e91462.
- 18 Gizard F, Zhao Y, Findeisen HM, Qing H, Cohn D, Heywood EB, Jones KL, Nomiyama T,  
19 Bruemmer D. 2011. Transcriptional regulation of S phase kinase-associated protein 2 by NR4A  
20 orphan nuclear receptor NOR1 in vascular smooth muscle cells. *J Biol Chem* **286**: 35485-35493.
- 21 Klamt F, Zdanov S, Levine RL, Pariser A, Zhang Y, Zhang B, Yu LR, Veenstra TD, Shacter E.  
22 2009. Oxidant-induced apoptosis is mediated by oxidation of the actin-regulatory protein cofilin.  
23 *Nat Cell Biol* **11**: 1241-1246.
- 24 Marinho HS, Real C, Cyrne L, Soares H, Antunes F. 2014. Hydrogen peroxide sensing,  
25 signaling and regulation of transcription factors. *Redox Biol* **2**: 535-562.
- 26 Mathis D, Vence L, Benoist C. 2001  $\beta$ -Cell death during progression to diabetes. *Nature* **414**:  
27 792-798.
- 28 McCluskey JT, Hamid M, Guo-Parke H, McClenaghan NH, Gomis R, Flatt PR. 2011.  
29 Development and functional characterization of insulin-releasing human pancreatic beta cell  
30 lines produced by electrofusion. *J Biol Chem* **286**: 21982-21992.

- 1 Mosmann T. 1983. Rapid colorimetric assay for cellular growth and survival: application to  
2 proliferation and cytotoxicity assays. *J Immunol Methods* **65**: 55-63.
- 3 Nomi Y, Shimizu S, Sone Y, Mai TT, Tien PG, Kamiyama M, Shibamoto T, Shindo K, Otsuka  
4 Y. (2012) Isolation and antioxidant activity of zeylaniin A, a new macrocyclic ellagitannin from  
5 *Syzygium zeylanicum* leaves. *J Agric Food Chem* **60**: 10263-10269.
- 6 Nguyen T, Nioi P, Pickett CB. 2009. The Nrf2-antioxidant response element signaling pathway  
7 and its activation by oxidative stress. *J Biol Chem* **284**: 13291-13295.
- 8 Oba R, Kudo Y, Sato N, Noda R, Otsuka Y. 2006. A new method of competitive reverse  
9 transcription polymerase chain reaction with SYBR Gold staining for quantitative analysis of  
10 mRNA. *Electrophoresis* **27**: 2865-2868.
- 11 Philips A, Lesage S, Gingras R, Maira MH, Gauthier Y, Hugo P, Drouin J. 1997. Novel  
12 dimeric Nur77 signaling mechanism in endocrine and lymphoid cells. *Mol Cell Biol* **17**: 5946-  
13 5951.
- 14 Robertson RP. 2004 Chronic oxidative stress as a central mechanism for glucose toxicity in  
15 pancreatic islet beta cells in diabetes. *J Biol Chem* **279**: 42351-42354.
- 16 Robertson RP, Harmon JS. 2006. Diabetes, glucose toxicity, and oxidative stress: A case of  
17 double jeopardy for the pancreatic islet beta cell. *Free Radic Biol Med* **41**:177-184.
- 18 Robertson RP. 2010. Antioxidant drugs for treating beta-cell oxidative stress in type 2 diabetes:  
19 glucose-centric versus insulin-centric therapy. *Discov Med* **9**: 132-137.
- 20 Safe S, Jin UH, Morpurgo B, Abudayyeh A, Singh M, Tjalkens RB. 2016. Nuclear receptor 4A  
21 (NR4A) family - orphans no more. *J Steroid Biochem Mol Biol* **157**: 48-60.
- 22 Shimizu Y, Miyakura R, Otsuka Y. 2015. Nuclear receptor subfamily 4, group A, member 1  
23 inhibits extrinsic apoptosis and reduces caspase-8 activity in H<sub>2</sub>O<sub>2</sub>-induced human HUC-F2  
24 fibroblasts. *Redox Rep* **20**: 81-88.
- 25 Tessem JS, Moss LG, Chao LC, Arlotto M, Lu D, Jensen MV, Stephens SB, Tontonoz P,  
26 Hohmeier HE, Newgard CB. 2014. Nkx6.1 regulates islet beta-cell proliferation via Nr4a1 and  
27 Nr4a3 nuclear receptors. *Proc Natl Acad Sci U S A* **111**: 5242-5247. doi:
- 28 Wang T, Sun P, Chen L, Huang Q, Chen K, Jia Q, Li Y, Wang H. 2014. Cinnamtannin D-1  
29 Protects Pancreatic  $\beta$ -Cells from Palmitic Acid-Induced Apoptosis by Attenuating Oxidative  
30 Stress. *J Agric Food Chem* **62**: 5038-5045.
- 31 Weinberg E, Maymon T, Weinreb M. 2014. AGEs induce caspase-mediated apoptosis of rat  
32 BMSCs via TNF $\alpha$  production and oxidative stress. *J Mol Endocrinol* **52**: 67-76.

33

34 **TABLE AND FIGURES LEGENDS**

1  
2 Table 1. Comparison of expression of genes measured by microarray and real time PCR  
3 between H<sub>2</sub>O<sub>2</sub> treated cells and control cells.  
4 Average of 2 microarray data of H<sub>2</sub>O<sub>2</sub> treated cells was compared with 1 microarray data of  
5 control cells after normalization. For comparison with real time PCR, 12 RNA from 12 cell  
6 culture dishes in 2 groups obtained for microarray were used, and the result of real time PCR  
7 was expressed by the average of GAPDH and β-actin. \* p<0.05  
8 Table 2. Changes of gene expression after siRNA of NR4A3 treatment measured by microarray.  
9 Average of 3 microarray data of siRNA of NR4A3 treated cells after normalization was  
10 compared with average of 3 microarray data of control cells.  
11  
12 Fig.1. Effect of H<sub>2</sub>O<sub>2</sub> concentration on the cell growth of 1.1B4 islet derived cell.  
13 Islet derived 1.1B4 cell was seeded and cultured in RPMI-1640 medium, and 24 hours later cell  
14 was added H<sub>2</sub>O<sub>2</sub> to 10, 20, 30, 40, 50, 100, 200 μM and cell viability was analyzed at 24, 48 and  
15 72 hours by MTT assay. (n=5)  
16  
17 Fig. 2. Effect of H<sub>2</sub>O<sub>2</sub> concentration on *NR4A3* gene expression and time course of expression.  
18 **A**, Human 1.1B4 cell (1.0 x 10<sup>5</sup> cells/ml) was incubated in 2ml culture medium and 24 hours  
19 later medium was changed to individual concentration of H<sub>2</sub>O<sub>2</sub> containing medium, then 4 or 24  
20 hours later total RNA was extracted with Isogen. Expression of *NR4A3* was measured by real  
21 time PCR with condition B. n=3. **B**, After addition of 100 μM of H<sub>2</sub>O<sub>2</sub>, cell was incubated  
22 individual time and RNA was extracted. n=3. β-Actin was used for control.  
23  
24 Fig. 3. Effect of *NR4A3* knocked down on the expression of *NR4A3* and cell viability. **A**, After  
25 knocked down of *NR4A3* gene in 1.1B4 cell with siRNA, total RNA was extracted and  
26 expression of *NR4A3* and β-actin was measured by real time PCR with Cyber green method  
27 with condition B. n=3 \*p<0.05. **B**, After knocked down of *NR4A3* gene of 1.1B4 cell, cell was  
28 incubated with 100 μM of H<sub>2</sub>O<sub>2</sub>, and cell viability was measured by MTT assay. n=5. NC:  
29 negative control; NFW: nuclease free water added cell; siNR4A3: siRNA of *NR4A3* treated cell.

1

2 Fig. 4. Changes of Various Gene expression in 1.1B4 Cell after the knocked down of *NR4A3*  
3 mRNA measured by real time PCR.

4 (A) Human 1.1B4 cells were incubated 24hours, half of them (n=9) were added siRNA  
5 (siNR4A3) and another half (n=9) were added nuclease free water (NFW), and after 52 hours,  
6 mRNA was purified with RNeasy Plus Mini Kit. Expression of *NR4A3* was measured by real  
7 time PCR with Taqman method using condition C. TATA binding protein (TBP) mRNA was  
8 used for internal control. (B) The *NR4A1* expression, (C) *NR4A2* expression. (D) - (E)  
9 *NFKB1* and *HMOX1* respectively. (F) *GLRX* expression (n=8). (G) Human 1.1B4 cells were  
10 incubated 24hours, half of them (n=3) were added siRNA (siNR4A3) and another half (n=3)  
11 were added NFW, and after 52 hours, mRNA was purified with Isogen reagent and treated with  
12 RNase-free DNase. Expression of *SOD3* was measured by real time PCR with Cyber green  
13 method using condition B.  $\beta$ -Actin was used for control. (H) Expression of *GPX1* using same  
14 method of (G). (I) *E2F1* using same method of (A) (n=8). (J) - (M) *p27Kip1*, *CDK2*, *CCNE1*  
15 and *PMEL*, respectively, using same method of (A). (N) *RAB5B* using same method of (A)  
16 (n=8).

17

18 Fig. 5. Gene structure of *HMOX1*.

19 Human *HMOX1* gene was obtained from PubMed gene (ACCESSION AY460337). NR4A3  
20 binding motif of aaggctca were searched and abstract of the gene structure was displayed. NFkB  
21 shows NFkB binding motif. FOSJUN shows FOS and JUN binding motif. EX1 *etc.* shows  
22 exon 1 *etc.*

23

24
